# Supplementary material for: Meiotic sex in Chagas disease parasite Trypanosoma cruzi
Source: PubMed Central journal article supplement (PMC6722143; doi:10.1038/s41467-019-11771-z), 2019-09-03
Supplement: 41467_2019_11771_MOESM1_ESM.pdf [file 41467_2019_11771_MOESM1_ESM.pdf]

## **Supplementary Information**

Meiotic sex in Chagas disease parasite *Trypanosoma cruzi*

Schwabl *et al.*

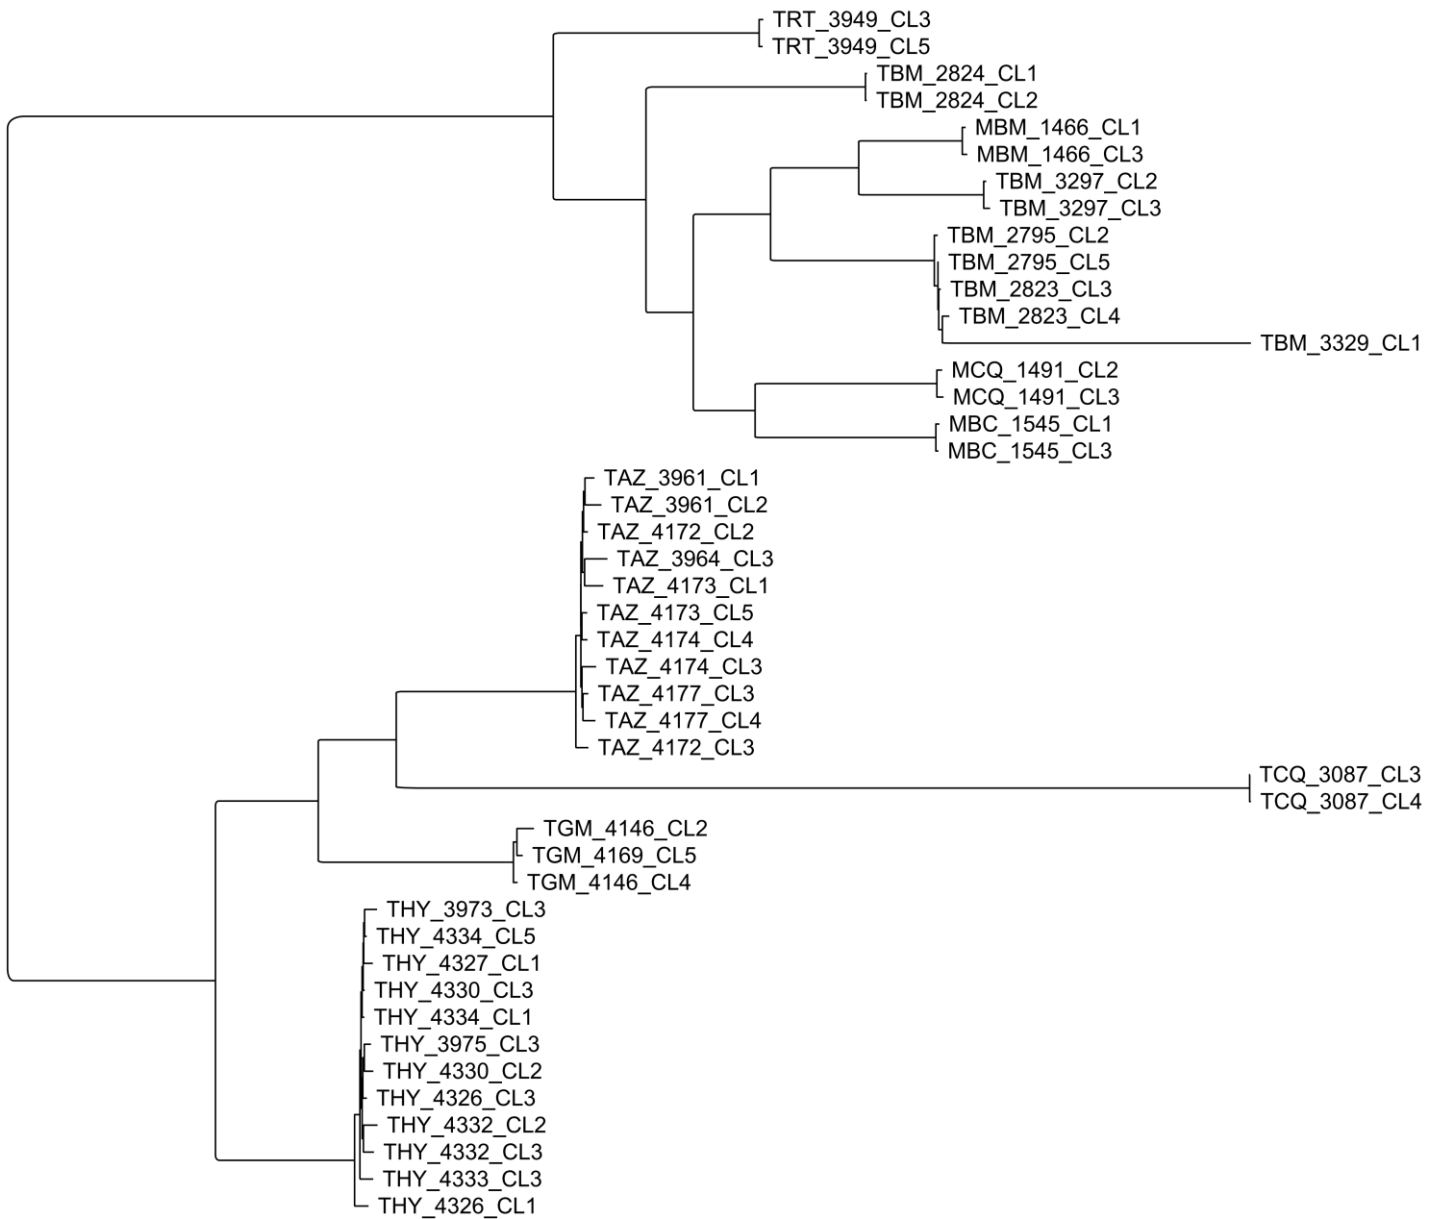

Supplementary Figure 1. Maximum-likelihood phylogenetic relationships among *T. cruzi* I clones. Pairwise genetic distances are haplotype-based, defined as the proportion of non-shared alleles across all SNP sites for which genotypes are called in all individuals ( $n = 7,392$ ). The tree follows a general time-reversible (GTR) substitution model with ascertainment bias correction.

**a**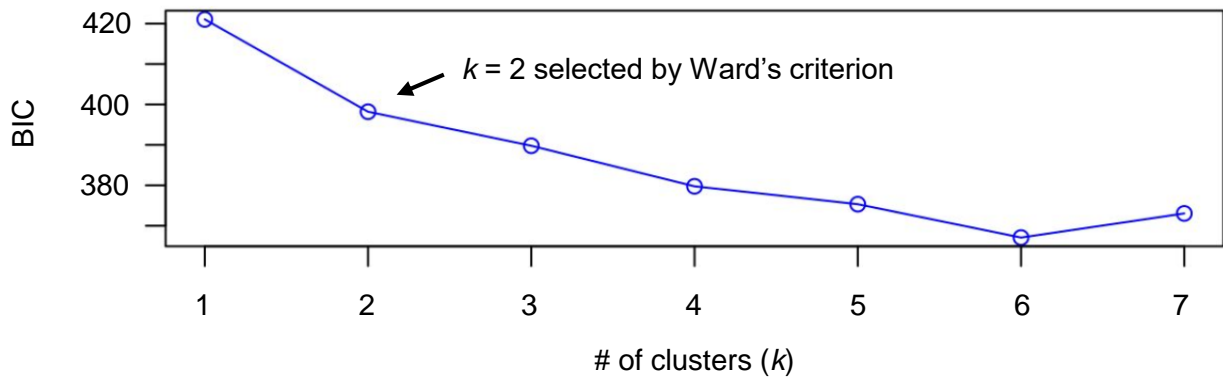**b**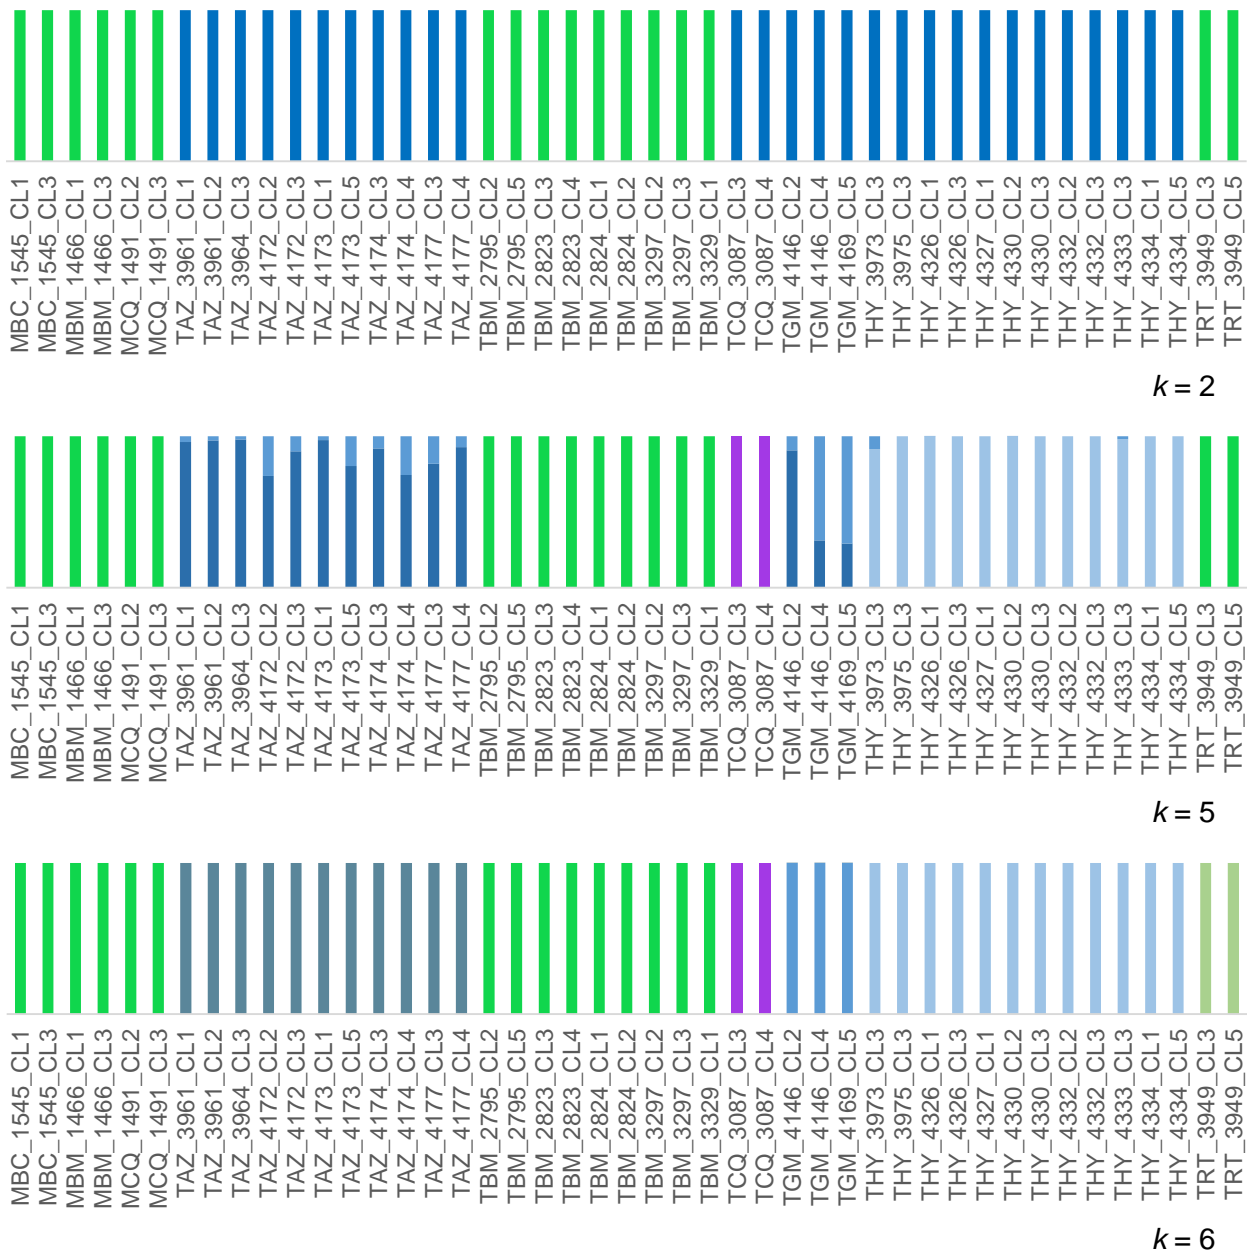

Supplementary Figure 2. Nonparametric population clustering of *T. cruzi* I clones. **a** Bayesian Information Criterion (BIC) scores of k-means clustering solutions for population assignment of *T. cruzi* I clones, based on 68,449 biallelic sites. Ward's criterion<sup>1</sup> was applied for objective selection of *k*. **b** Discriminant analysis of principle components (DAPC) membership probabilities for *k* = 2, *k* = 5 and *k* = 6. Latter k-means solutions allow for additional partitioning of genetic diversity but do not necessarily imply true population subdivision. Colors represent different population assignments.

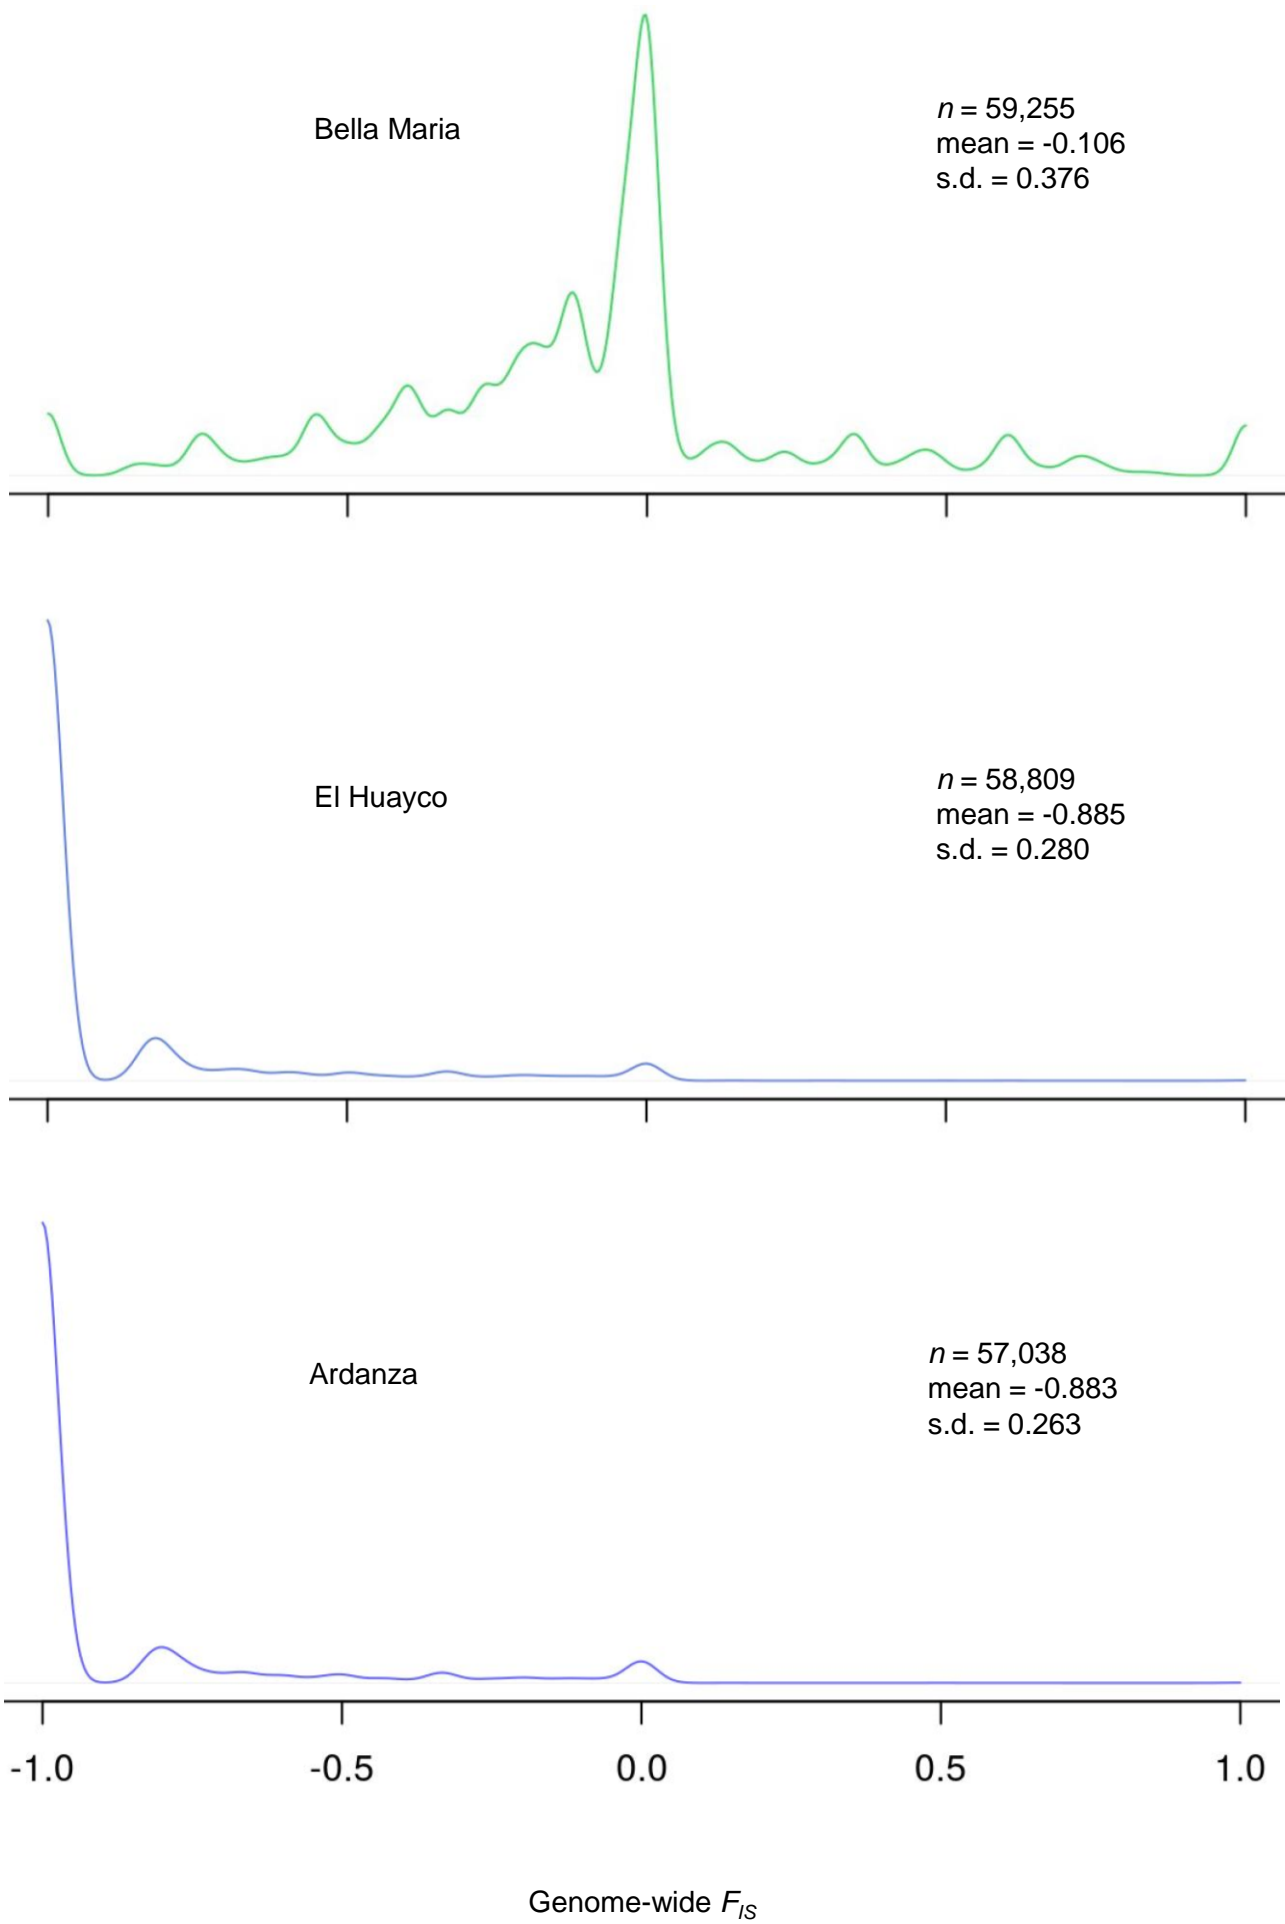

Supplementary Figure 3. Rates of homozygosity relative to Hardy-Weinberg expectations in *T. cruzi* I clones. Genome-wide density distributions of Wright's inbreeding coefficient  $F_{IS}$  are plotted for parasites from Bella Maria, El Huayco and Ardanza.  $F_{IS}$  sample size, mean and standard deviation are also given for each group, based on the dataset's total 130,996 diagnostic SNPs.

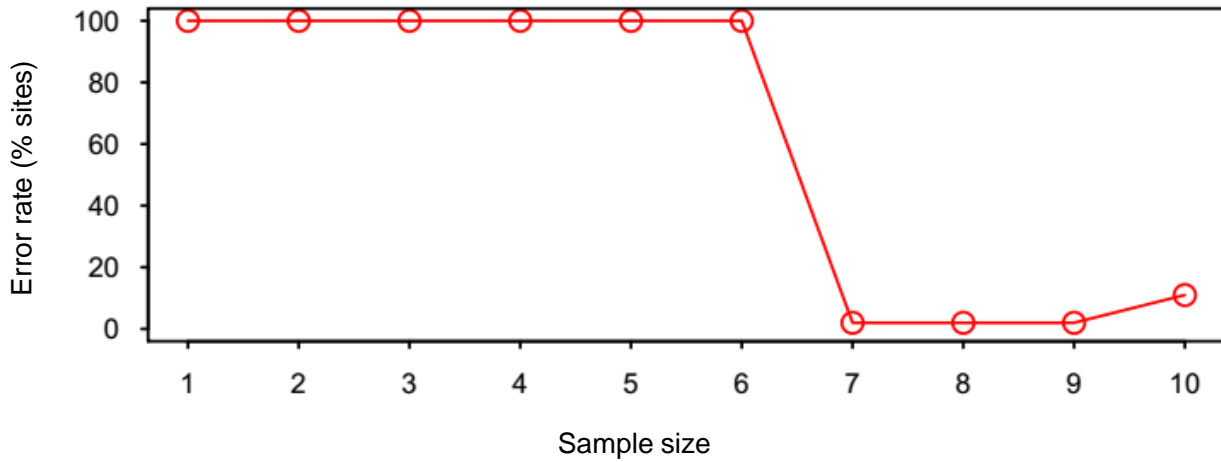

Supplementary Figure 4. Power to reject Hardy-Weinberg equilibrium in asexual genomes. We measured the proportion of SNP sites for which the `--hwe` function in `vcftools`<sup>2</sup> incorrectly accepts a null hypothesis of Hardy-Weinberg equilibrium (i.e.,  $p > 0.05$ ) in sets of 1 - 10 non-recombinant *T. cruzi* genomes (22,475 SNPs simulated with BamSurgeon<sup>3</sup>; see *Methods*). Type II error predominates when the simulated data is reduced to < 7 individuals, as occurs when observations from Loja are restricted to one clone per vector/host (see Ardanza in Supplementary Table 3).

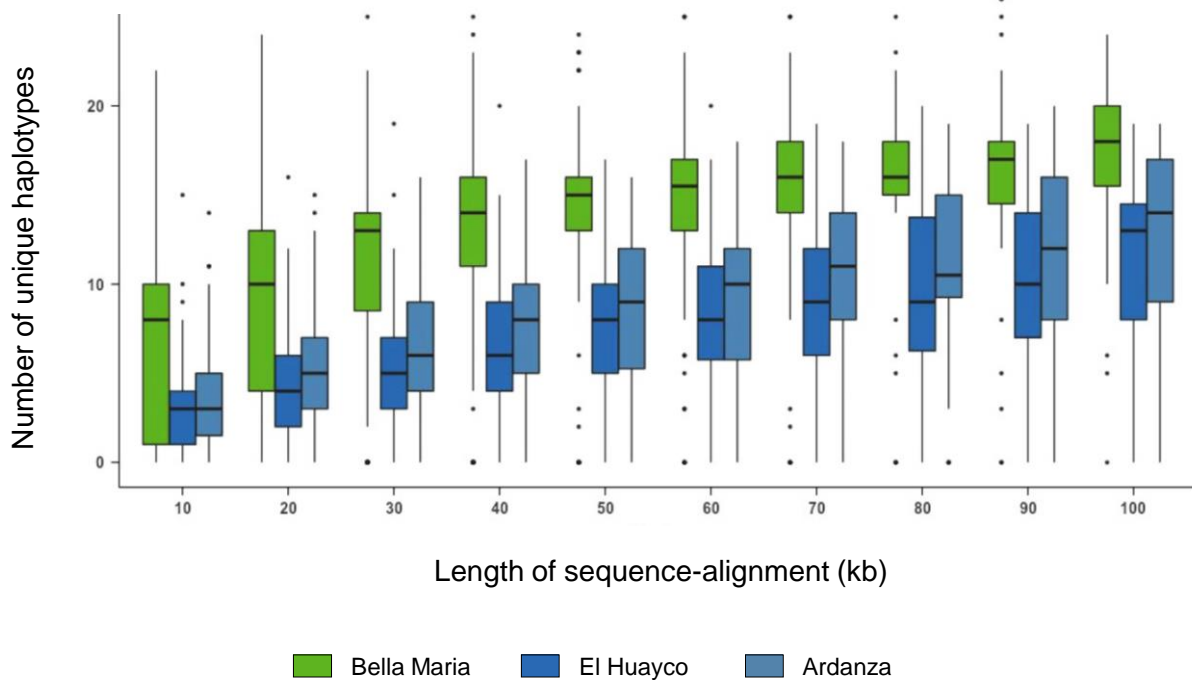

Supplementary Figure 5. Rates of haplotype differentiation relative to sequence length in *T. cruzi* I groups. Boxplots show median and interquartile range for the number of distinct haplotypes found in phased alignment ( $n = 70,306$  SNPs) at window sizes between 0 and 100 kb for Bella Maria, El Huayco and Ardanza groups.

a

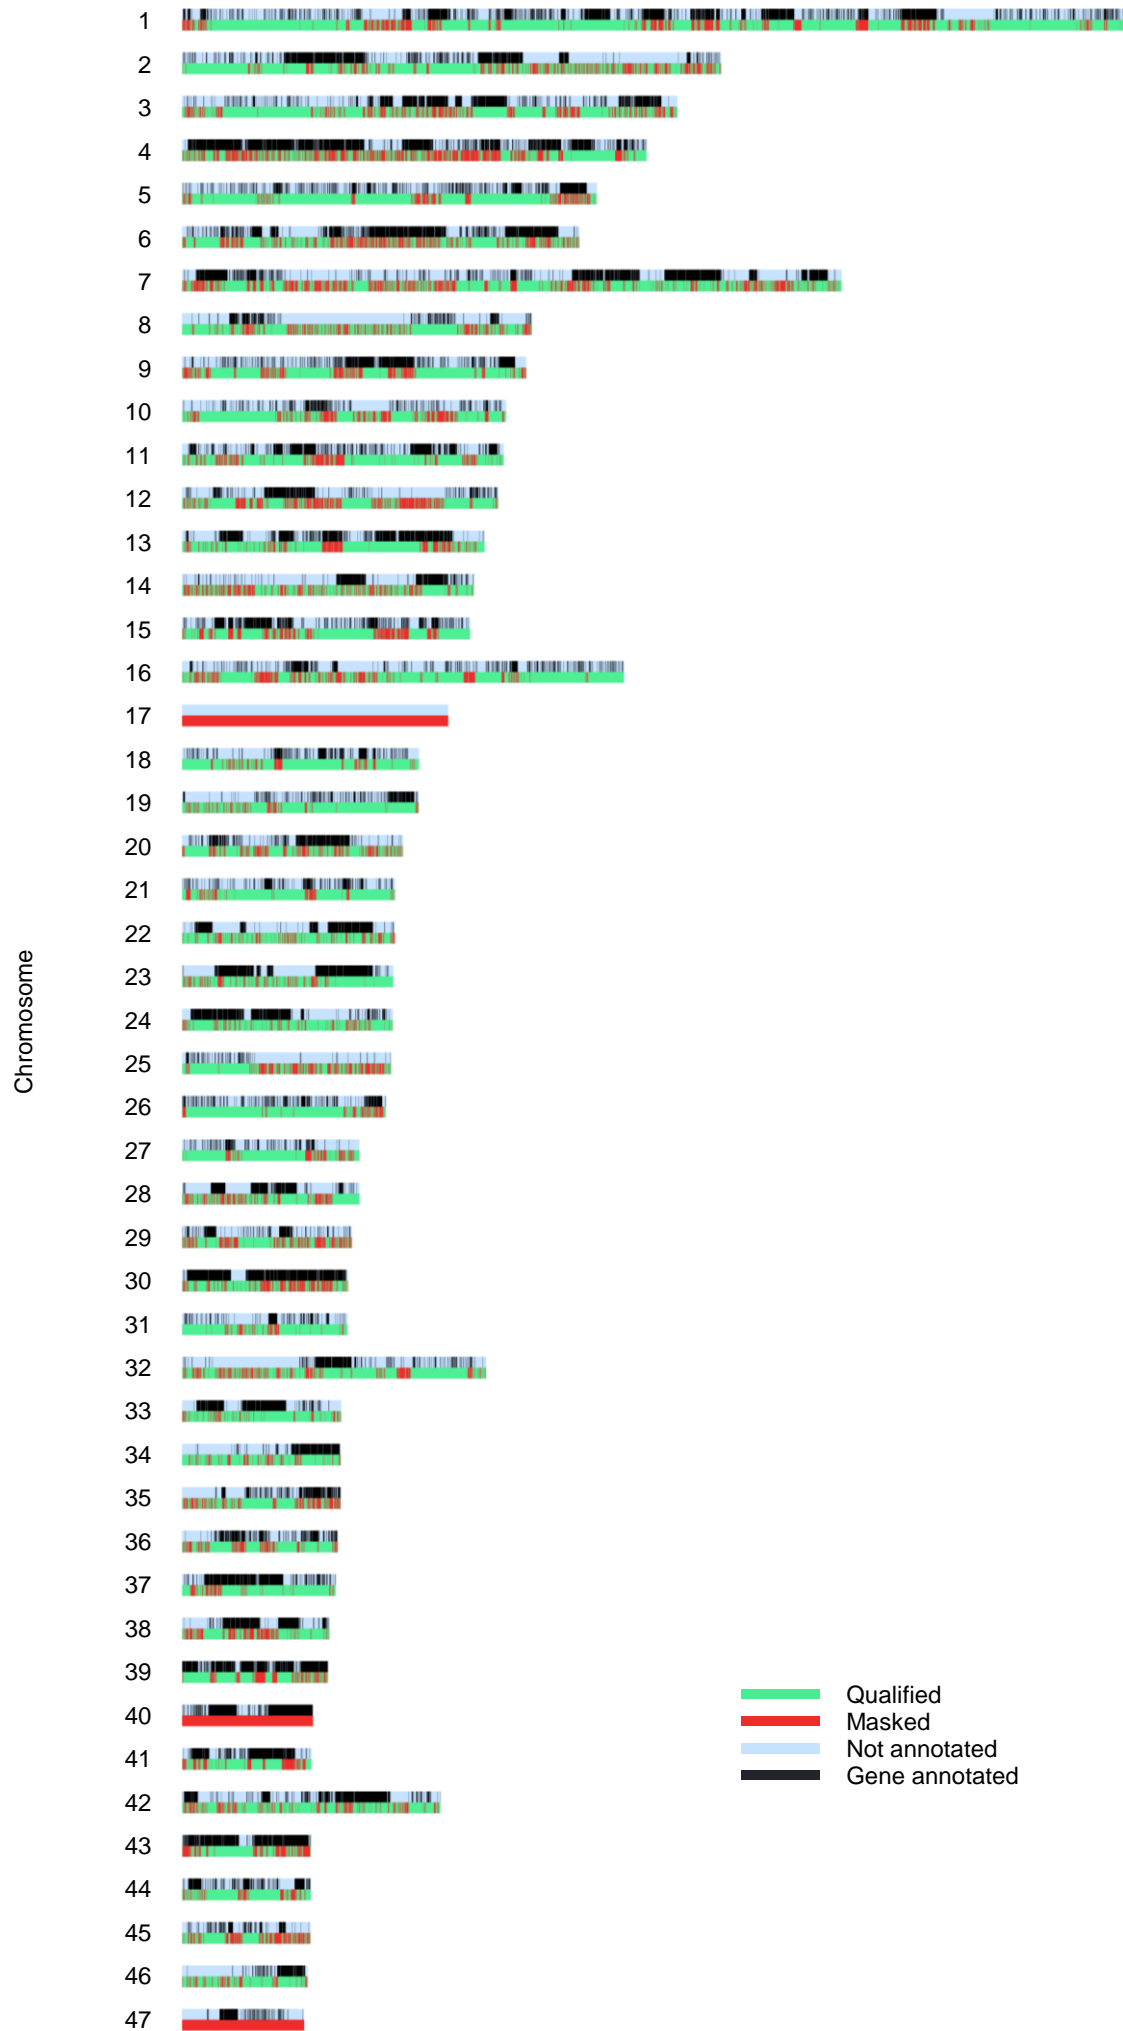

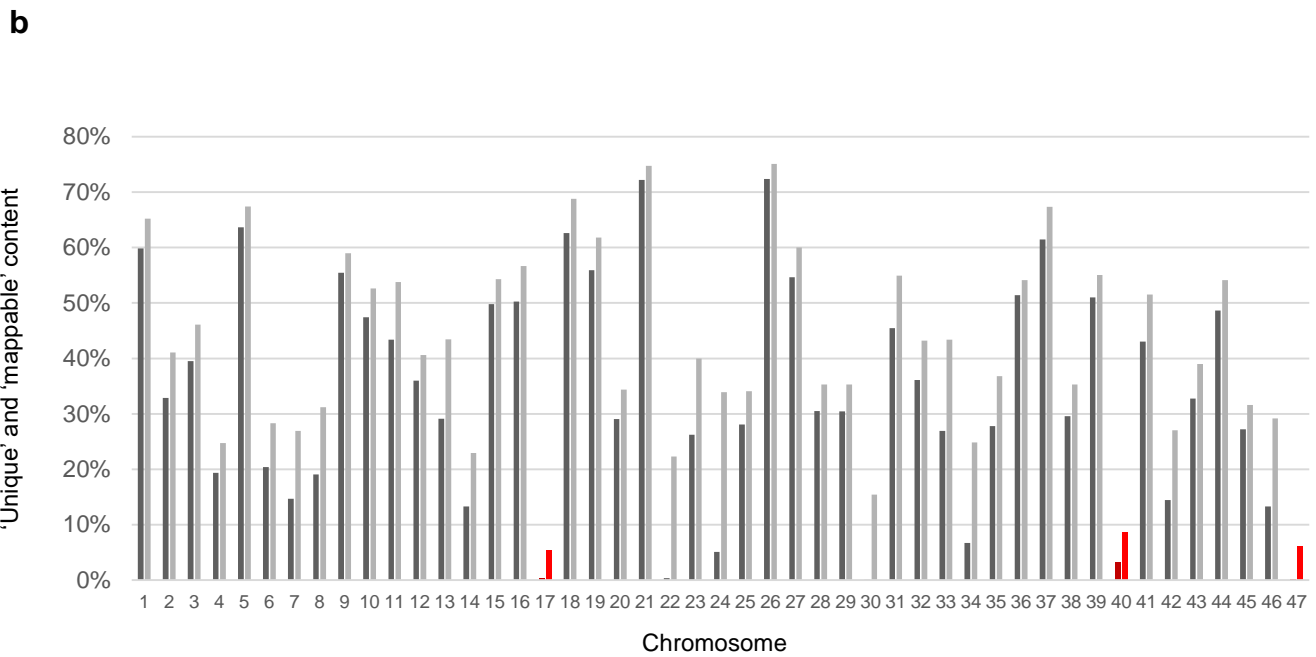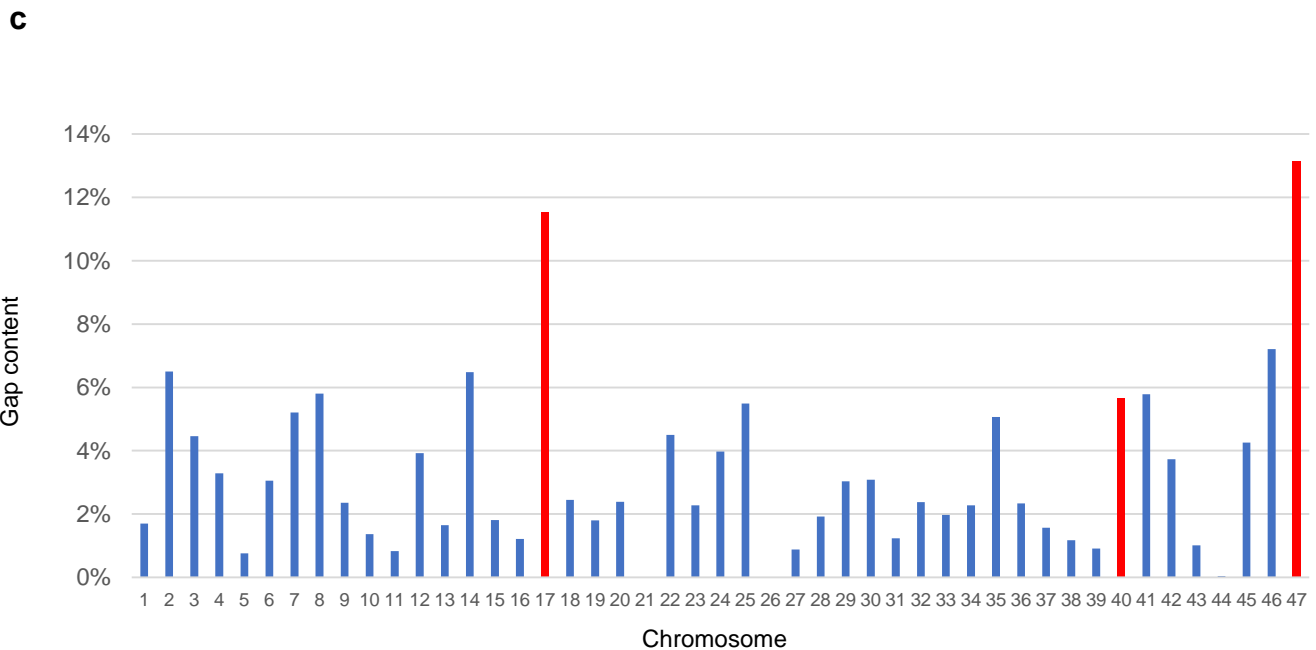

Supplementary Figure 6. TcI-Sylvio reference evaluation and masking. **a** Masks applied to the TcI-Sylvio reference genome based primarily on virtual mappability<sup>4</sup>. Final masking (red) disqualified a total of 24 Mb (including entire chromosomes 17, 40 and 47) of 42 Mb from polymorphism analysis. Annotated genes are marked in black. **b-c** Proportions of mappable<sup>4</sup>, unique (determined by self-blasting) and gap content on TcI-Sylvio reference chromosomes are indicated in light grey, dark grey and blue, respectively. Red bars distinguish chromosomes excluded from analysis based on these metrics.

**a****Linkage with distance on chromosome 1, only one clone per vector/host (Bella Maria)**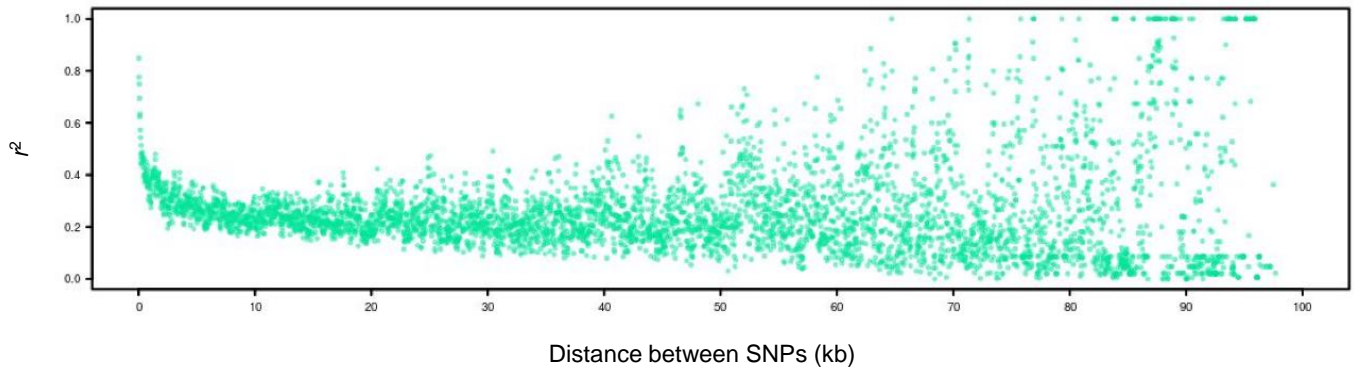**b****Linkage with distance on chromosome 1, only core regions (Bella Maria)**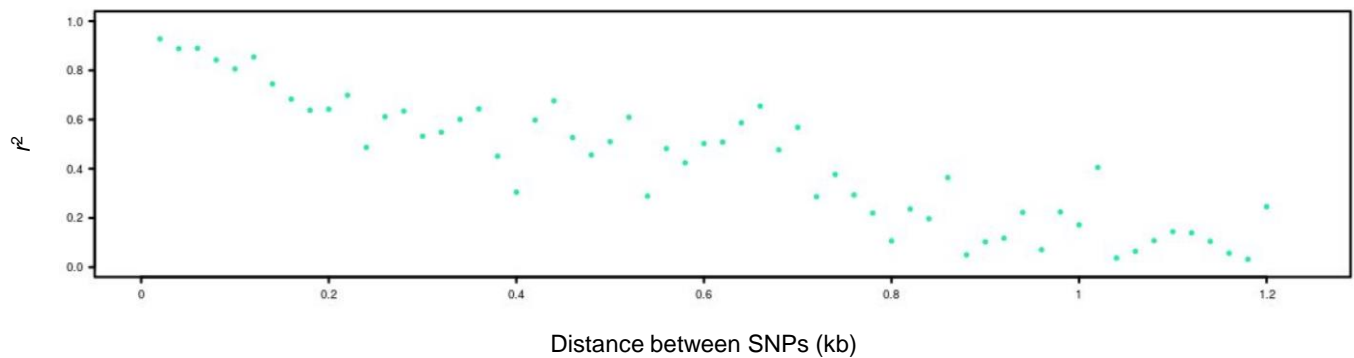

Supplementary Figure 7. Linkage decay in *T. cruzi* clones from Bella Maria, after sample subsetting. Linkage decay on chromosome 1 remains when analysis is restricted to **a** one random clone per host/vector ( $n = 4,670$  SNP sites) or **b** core sequence regions, defined as areas of synteny among Tc1-Sylvio, *T. b. brucei* and *L. major* reference genomes. Latter reduction in sample size to 1,178 sites limits analysis to short map distance classes (0 - 1.2 kb). Presentation is otherwise analogous to that in Fig. 3a.



### AAFAM for Cluster 1 (+ TCQ clones) chromosome 1

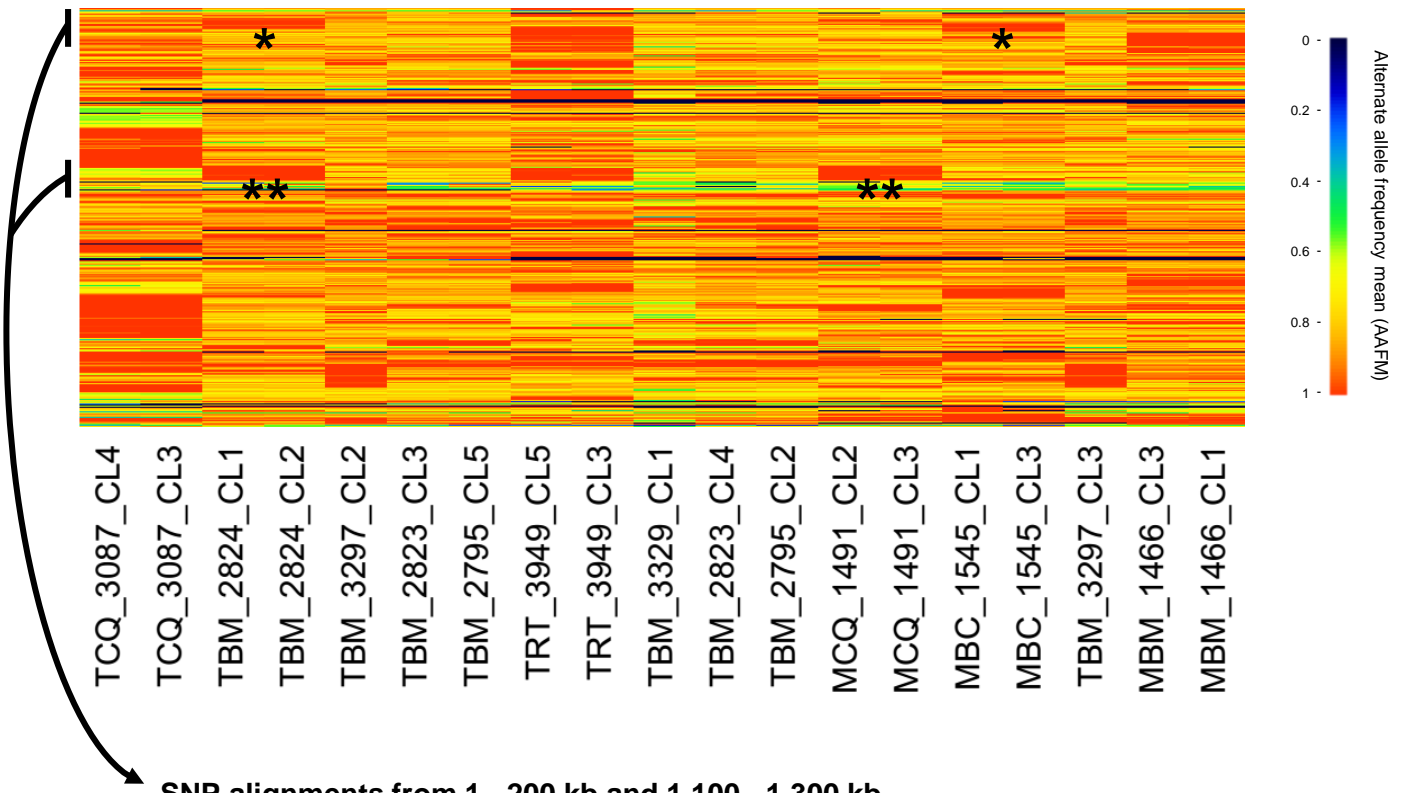

### SNP alignments from 1 - 200 kb and 1,100 - 1,300 kb

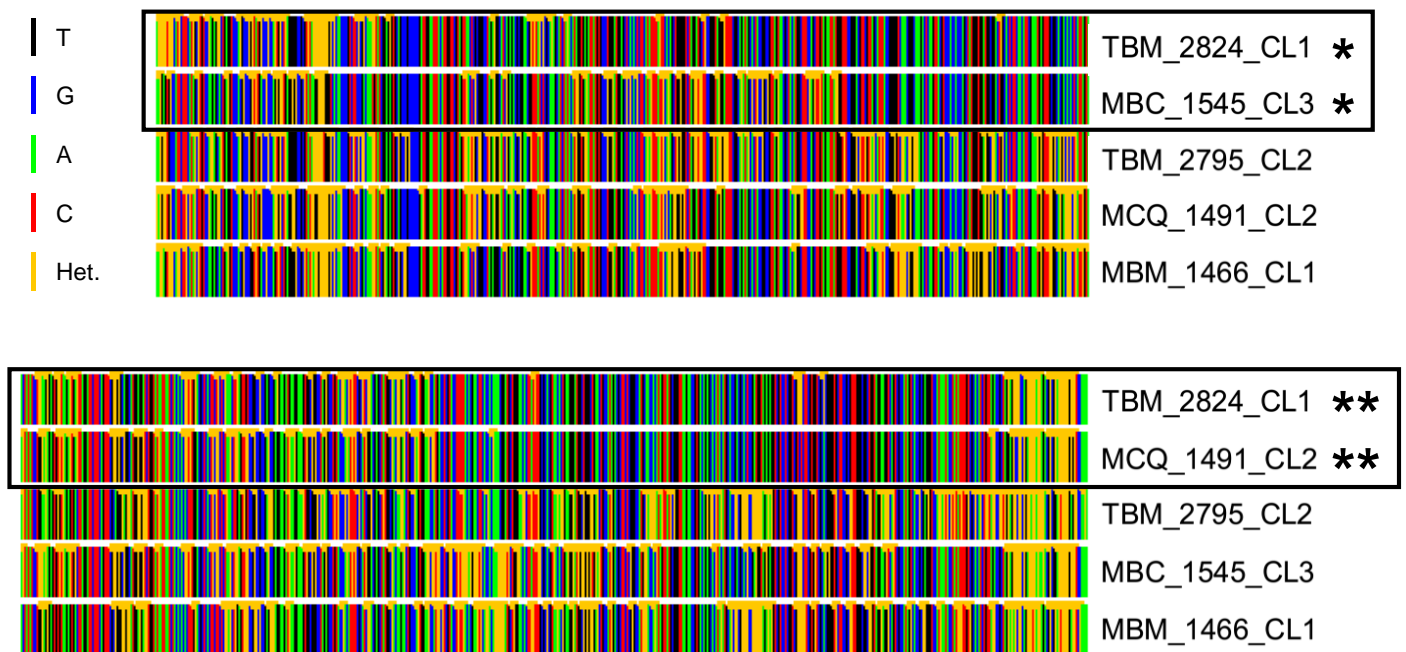

Supplementary Figure 8. Patchy homozygosity and SNP-sharing suggests recombination among *T. cruzi* I clones. In the top plot, each column represents the first chromosome of one clone. Rows within each column represent consecutive 5 kb sequence bins. Alternate allele frequency means (AAFAM) determine the color of each bin – blue (0) through green (0.5) to red (1). Long tracts of high AAFAM (i.e., large red patches) expose abrupt segmental increases in sequence similarity between different pairs of clones, as exemplified in the SNP concatenations below. Homozygous SNPs are colored according to base identity – black (T), blue (G), green (A) and red (C). Heterozygous SNPs are colored yellow. Single-asterisked AAFAM patches reflect high sequence similarity between TBM\_2824\_CL1 and MBC\_1545\_CL3 near the start of the chromosome 1. Double-asterisked patches at ca. 1,200 kb reflect a sudden shift in pairwise similarity. Here SNPs in TBM\_2824\_CL1 and MCQ\_1491\_CL2 begin to align.

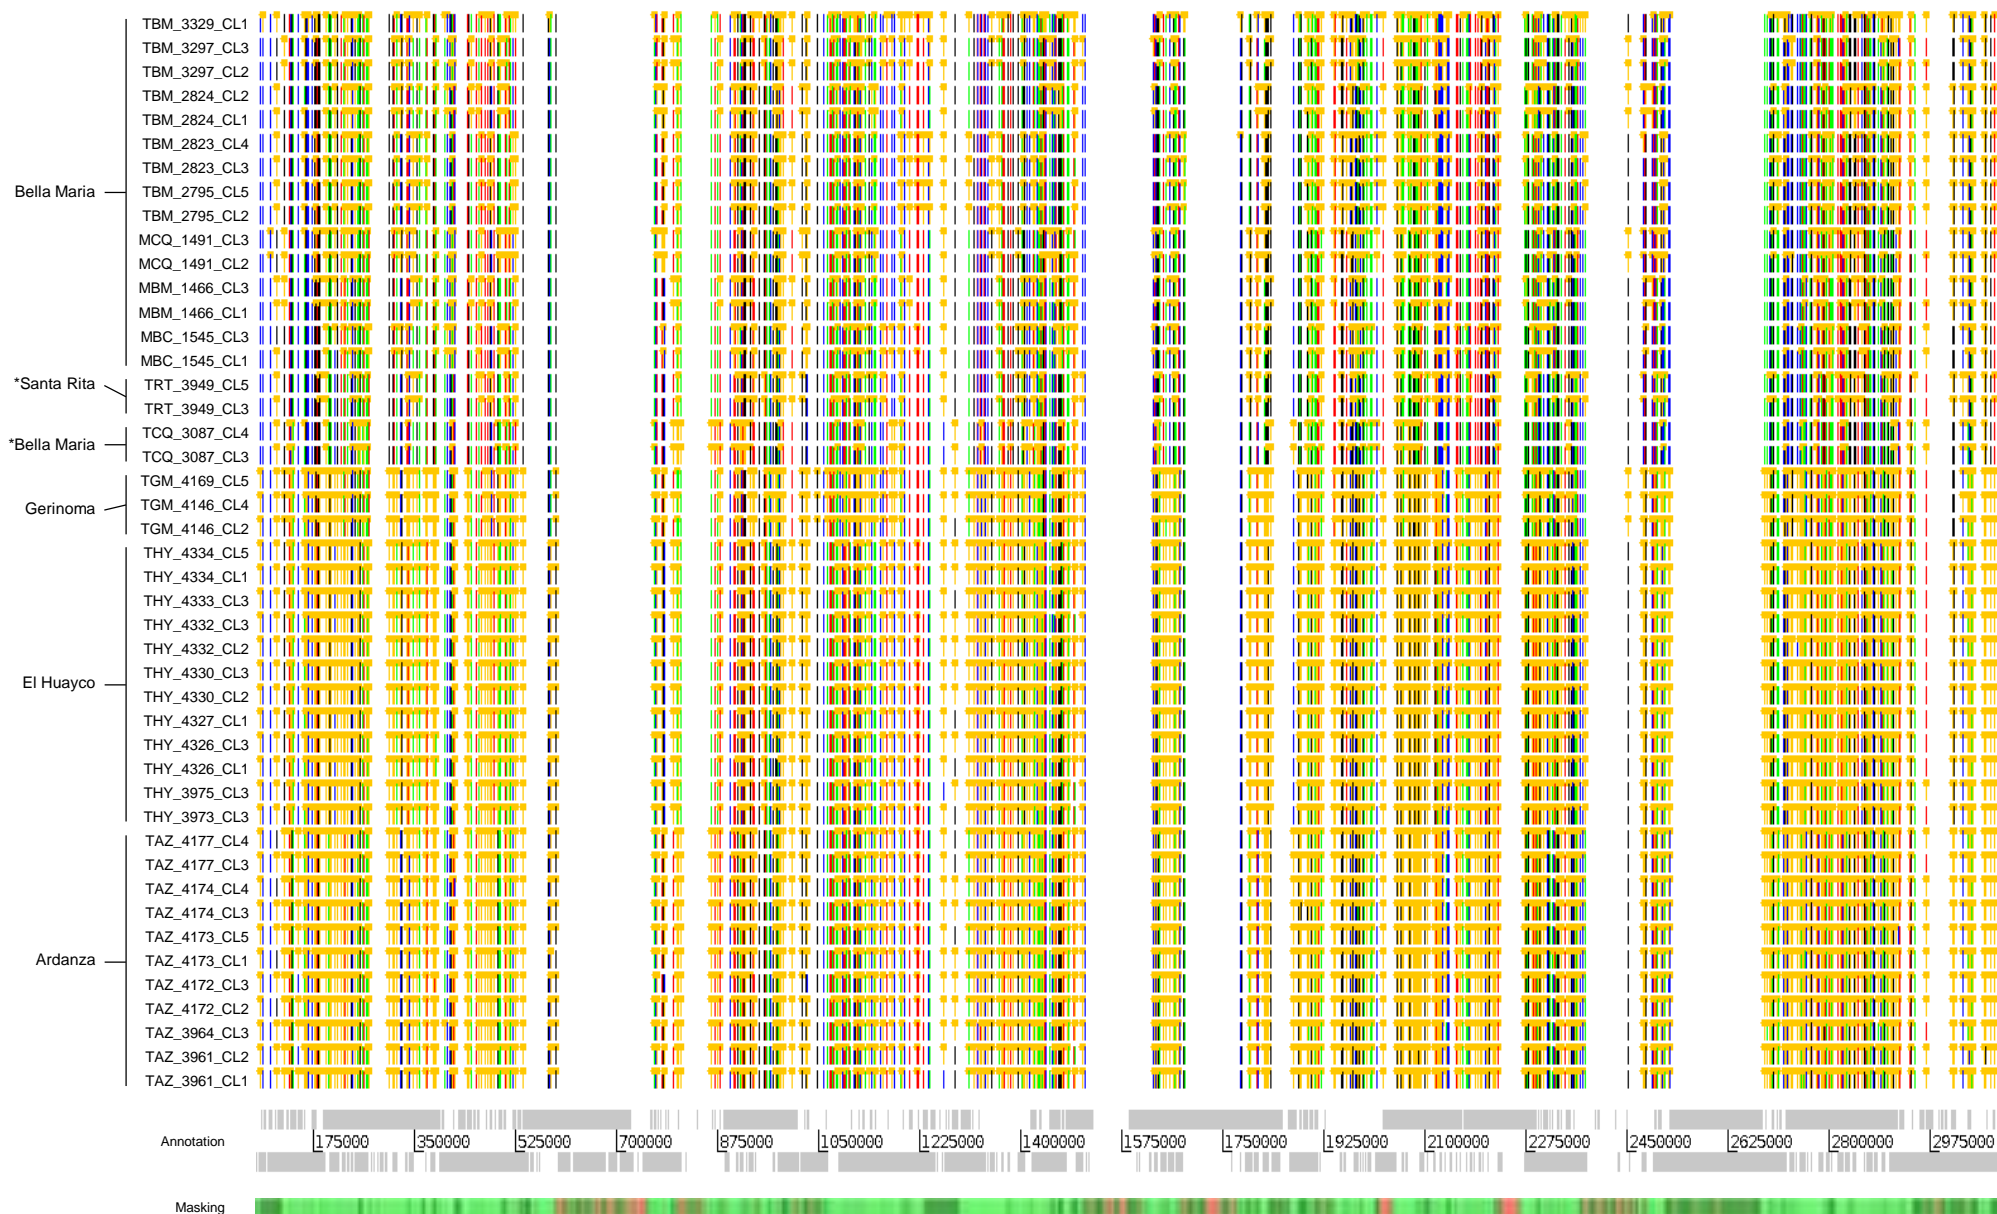

Supplementary Figure 9. SNP alignment across chromosome 1 for all *T. cruzi* clones. Homozygous SNPs are colored according to base identity – black (T), blue (G), green (A) and red (C). Heterozygous SNPs are colored yellow. Colors overlap where SNP density is high. Only sites without any missing genotypes are shown. White spaces in grey bars below the alignment represent coding regions on forward (top) and reverse (bottom) strands. The third bar indicates masked sequence regions in red, unmasked regions in green.

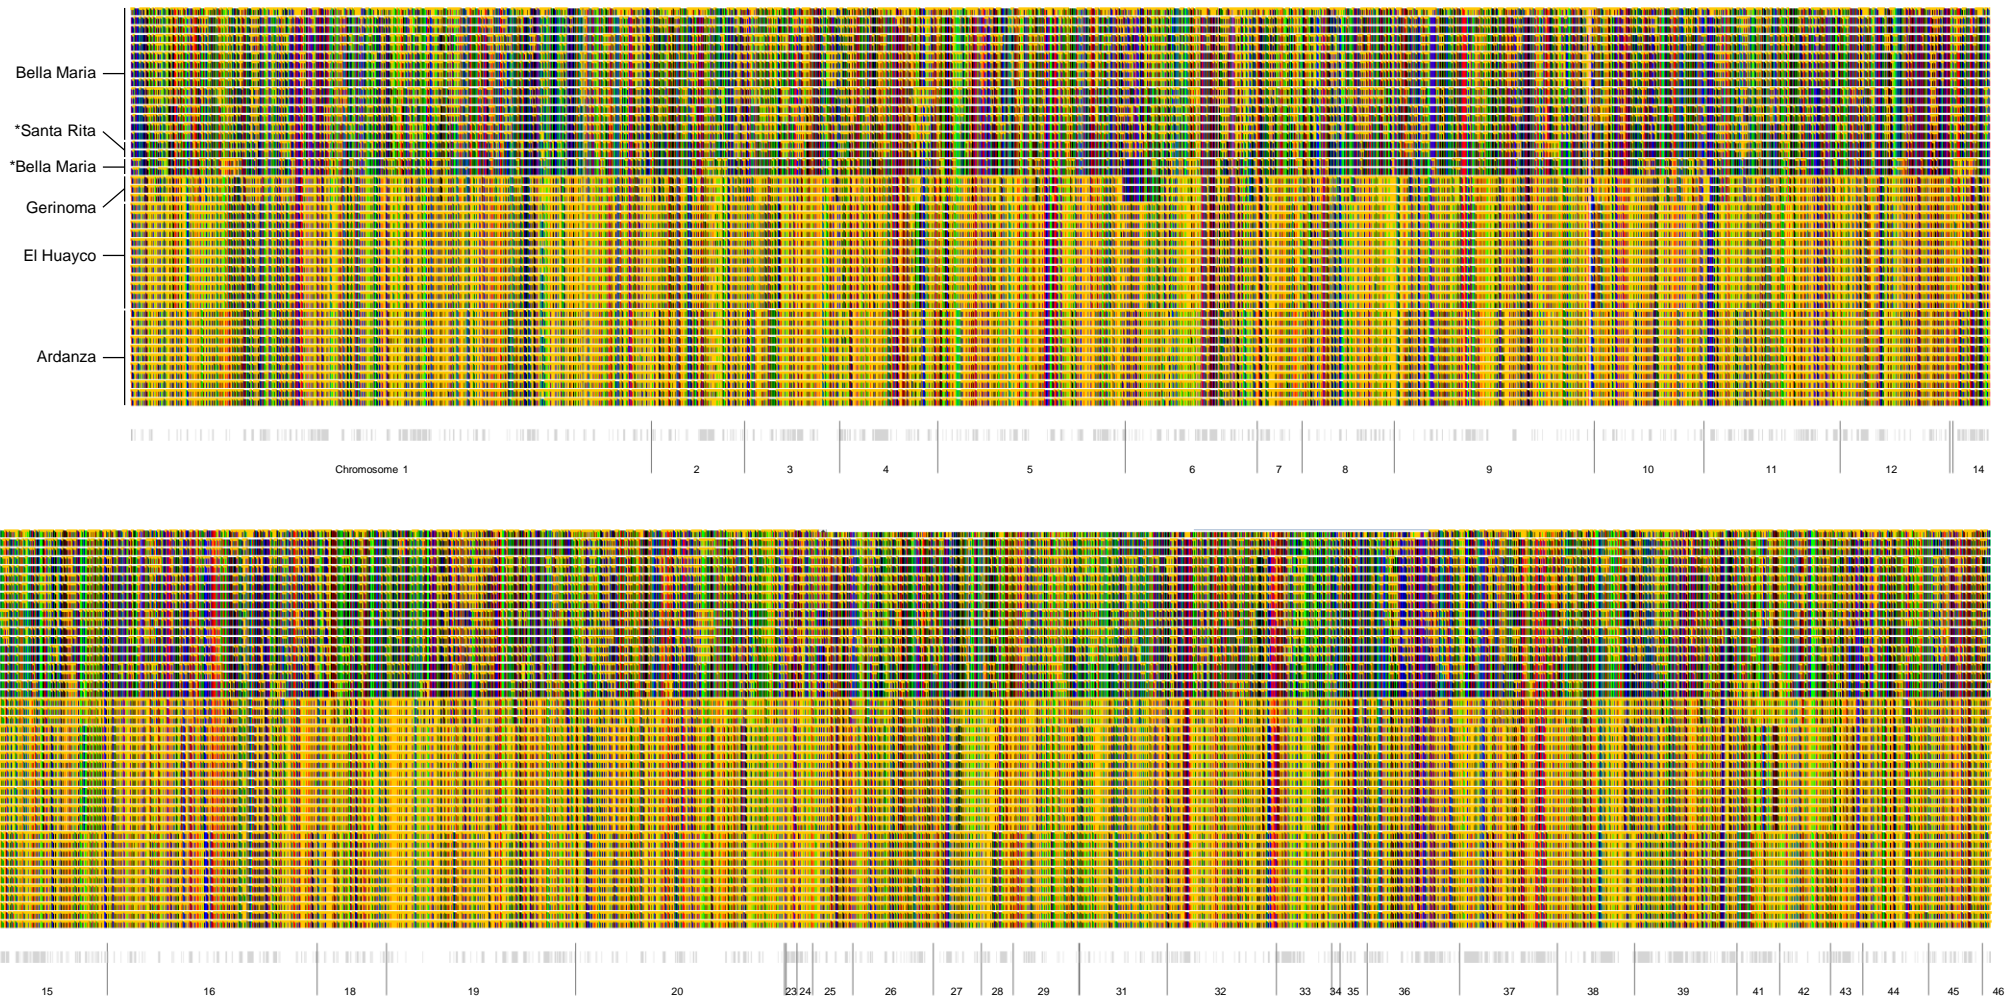

Supplementary Figure 10. Genome-wide SNP alignment for all *T. cruzi* clones. Homozygous SNPs are colored according to base identity – black (T), blue (G), green (A) and red (C). Heterozygous SNPs are colored yellow. Only variable sites without any missing genotypes are shown. Grey bars below the alignment represent SNPs in coding regions. Asterisks denote outlier samples from Santa Rita (TRT\_3949 clones) and Bella Maria (TCQ\_3087 clones). Occasional patches of shared homozygosity (e.g., see chromosome 36) in Cluster 2 were not associated to coding vs. non-coding sequence annotation ( $\chi^2 = 0.089$ ,  $df = 1$ ,  $p\text{-value} = 0.764$ ). Sample order matches that in Supplementary Figure 9.

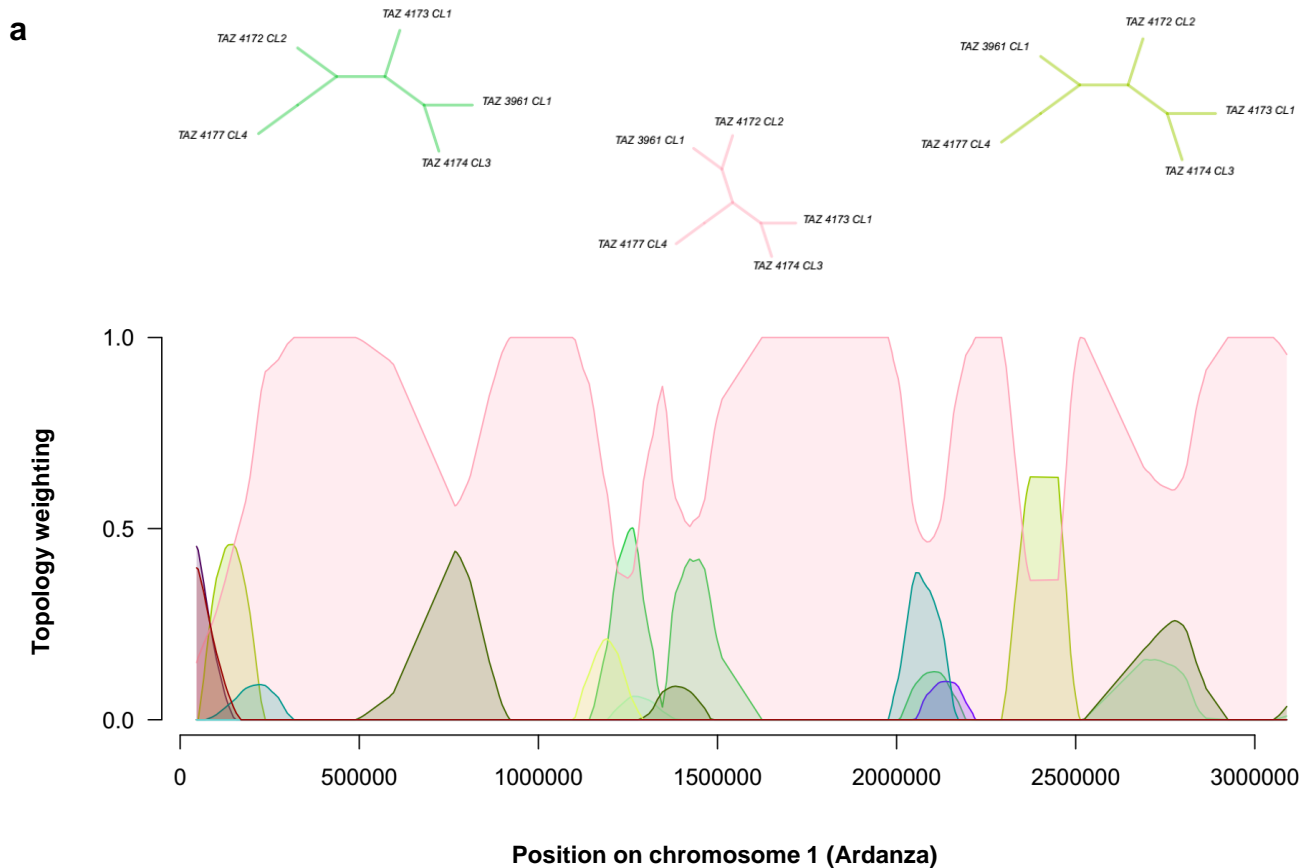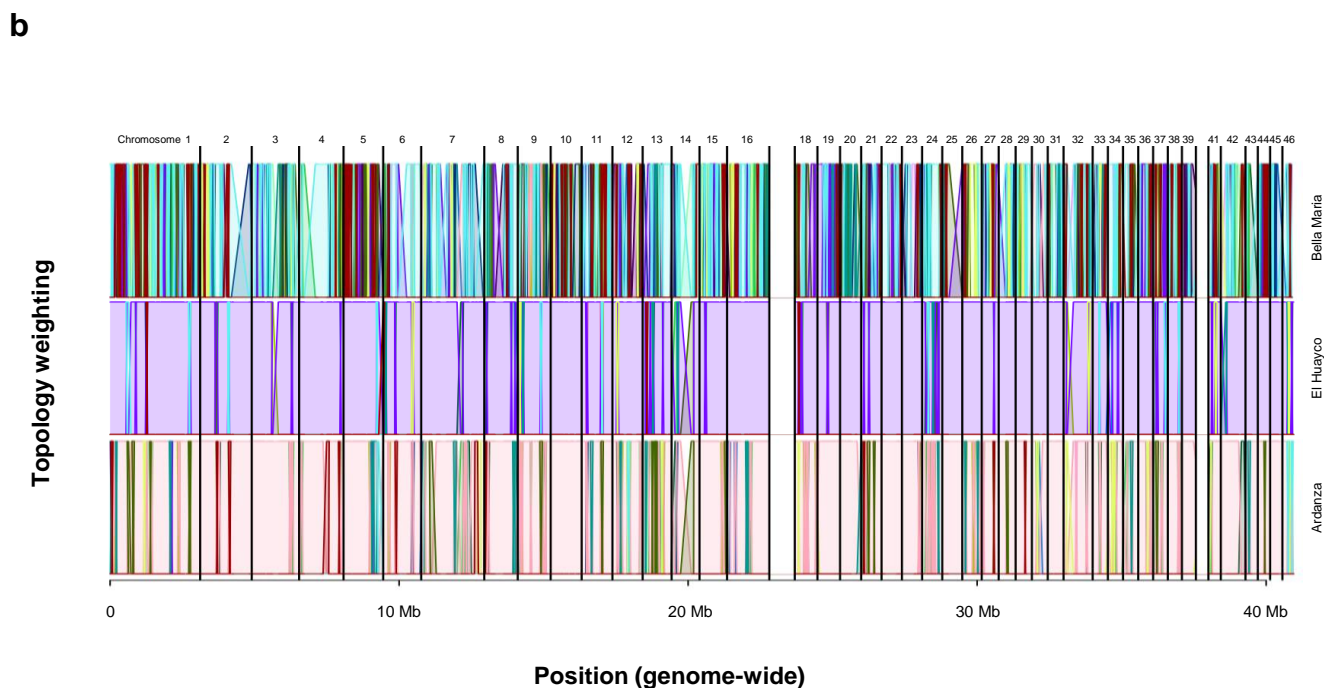

Supplementary Figure 11. Intra-chromosomal phylogenetic relationships among *T. cruzi* I clones. **a** Theoretically, fifteen neighbor-joining (NJ) topologies can be drawn to describe relationships among five samples within a larger phylogenetic tree. When NJ trees are constructed in 50 kb sliding-window analysis (step size = 10 kb), a single topology dominates across chromosome 1 for a five-sample subset from Ardanza. Similar is true for El Huayco (see Fig. 4d). Topology weightings (the relative abundances of the different five-sample topologies after iterative sampling of sub-trees<sup>5</sup>) are plotted (with loess smoothing; span = 0.125) for each window across the chromosome. **b** Mosaic (Bella Maria) vs. stable (Cluster 2) genealogies occur as such genome-wide. Colors represent different tree topologies. Poorly mapping chromosomes 17, 40 and 47 are excluded from analysis).

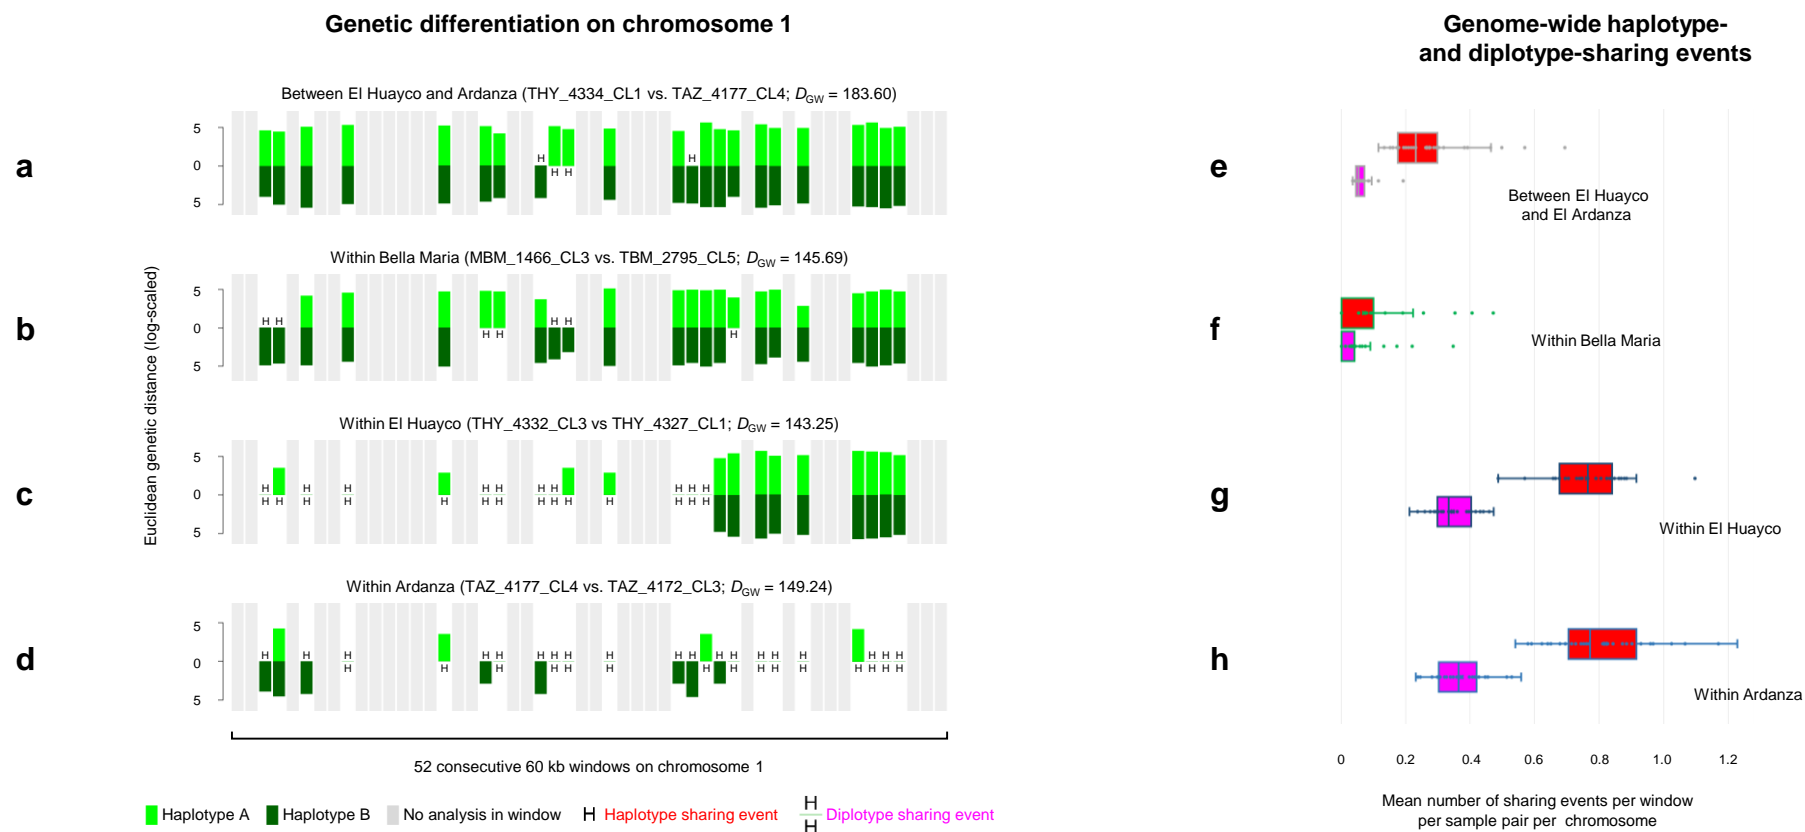

Supplementary Figure 12. Pairwise haplotype and diplotype sharing within and between *T. cruzi* I groups. In plots **a-d**, light green bars indicate genetic distances for pairs of samples in consecutive 60 kb sequence windows along phased haplotype A on chromosome 1 (996 SNP sites). Opposite bars (dark green) quantify distances for haplotype B. Windows of low and/or masked polymorphism (< 20 SNP sites per 60 kb) are shown in grey. These windows are excluded from analysis. **a** compares sample THY 4334 CL1 (El Huayco) to sample TAZ 4177 CL4 (Ardanza) and exemplifies between-group haplotype sharing (marked by the letter H) observed in Cluster 2. Several windows present matching 60 kb haplotypes, i.e., zero differentiation on haplotype A or B. Light or dark green bars therefore do not appear in these windows. **b** shows similar results from a pairwise comparison representative of haplotype differentiation within the Bella Maria group. Pairwise haplotype differentiation within El Huayco (**c**) and within Ardanza (**d**) is different. Shared haplotypes are much more abundant and many windows also present diplotype sharing (marked by two H's), i.e., identical SNP calls on both homologous haplotype segments in both *T. cruzi* clones. Plots **e-h** demonstrate how haplotype (red) and diplotype sharing (pink) events depicted in windowed bar plots for chromosome 1 also occur frequently on other chromosomes and in all possible pairwise comparisons within El Huayco ( $n = 66$  pairwise comparisons) and Ardanza ( $n = 55$ ). They occur less frequently within the Bella Maria group ( $n = 105$ ). Each point represents the mean number of sharing events per window per sample pair for one of 37 chromosomes (7,299 sites). Chromosomes 13, 17, 22, 23, 24, 30, 34, 40, 46 and 47 are excluded from analysis due to low polymorphism and/or heavy masking. Vertical bars in boxes and at box edges mark medians and interquartile ranges.  $D_{GW}$  is the genome-wide Euclidean genetic distance.

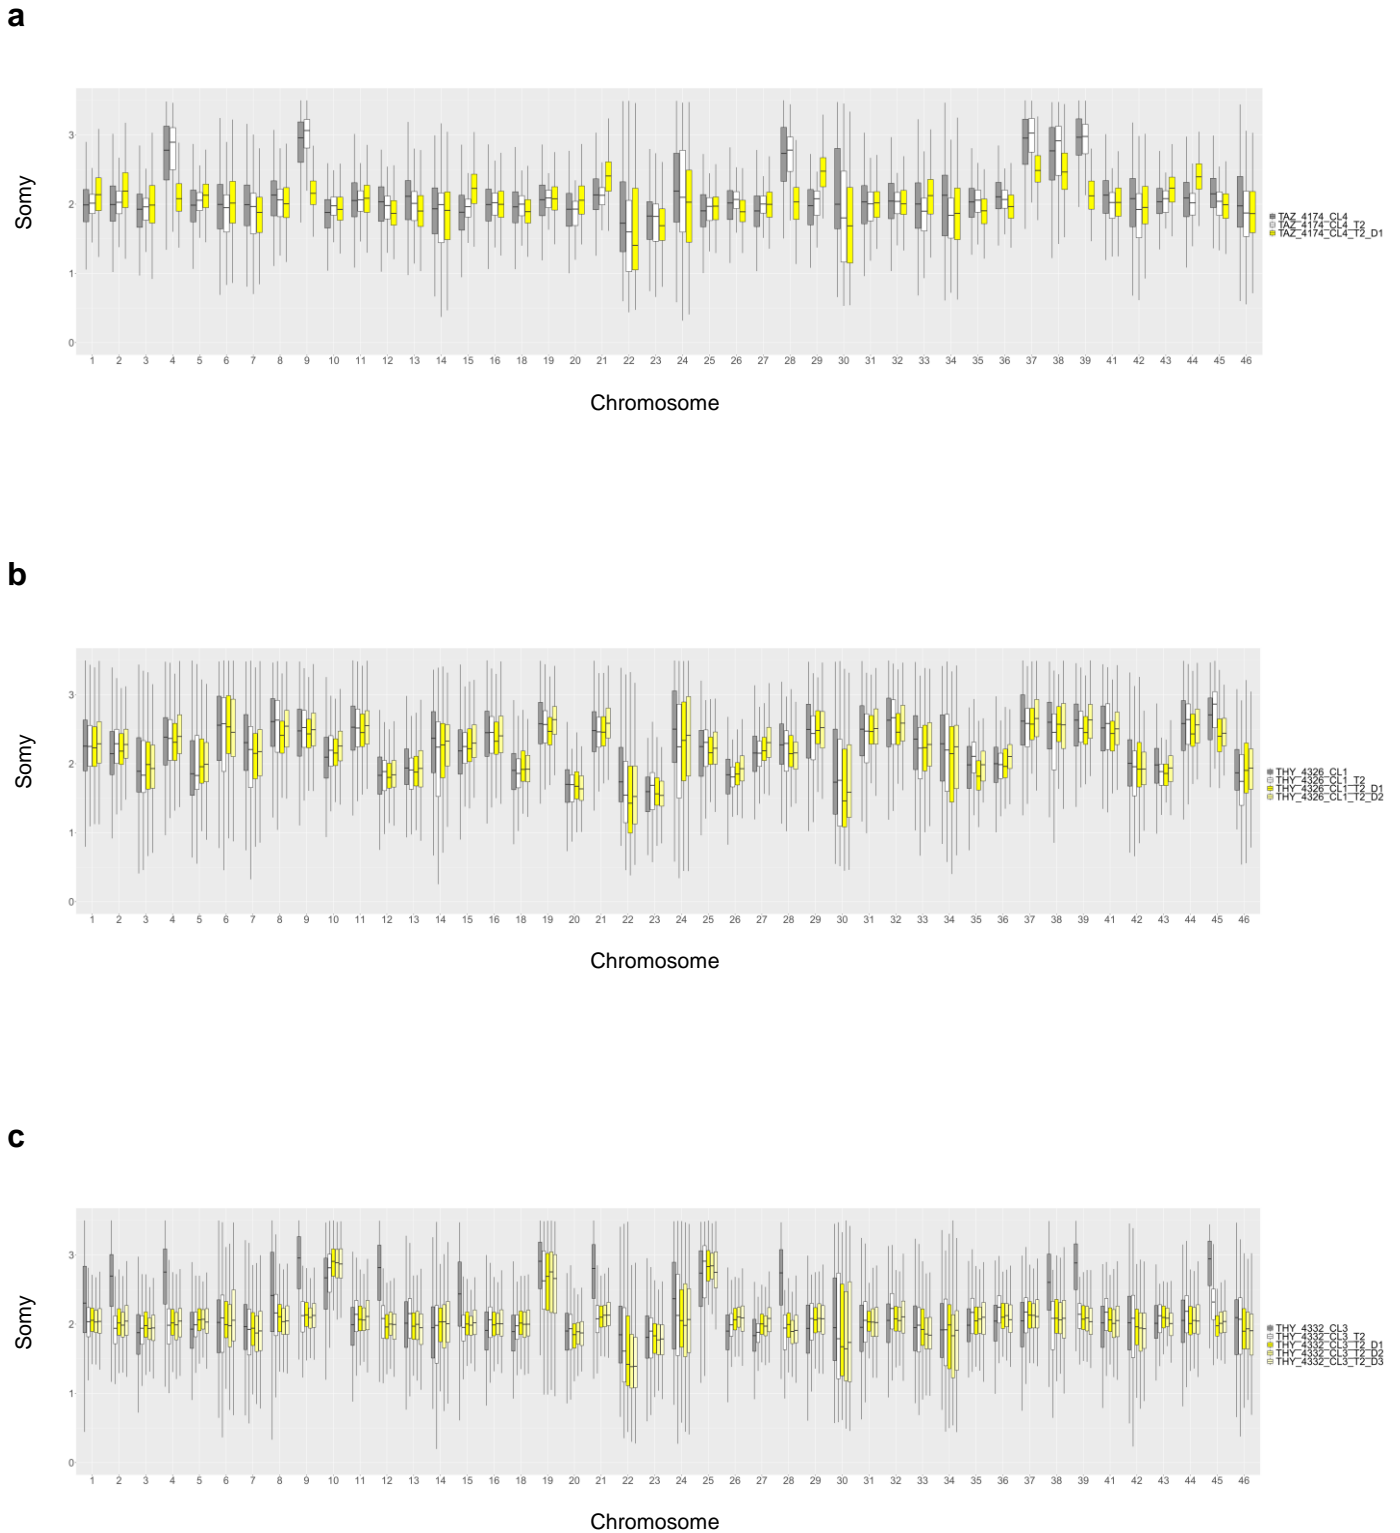

Supplementary Figure 13. Temporal and sub-clonal somy variation for selected *T. cruzi* I clones. **a** Following first sequencing and sample cryopreservation, TAZ\_4174\_CL4 was thawed, re-expanded in Liver Infusion Tryptose (LIT) medium (no additional passages) and sequenced for a second time. One subclone obtained from the re-cultured sample was also sequenced. Boxplots show median and interquartile range of site-wise somy estimates ( $2 \cdot m / p30$  of  $M_m$ ) for each chromosome (see *Methods*). While the ‘parent’ clone karyotype appeared unchanged at time of second sequencing (T2), results for subclone T2\_D1 suggest sub-clonal chromosomal copy number variation (e.g., see white vs. yellow boxplots for chromosomes 4 and 39). **b** THY\_4326\_CL1 was also re-sequenced but showed no evidence of somy differences between subclones ( $n = 2$ ) or over time. The sample was passaged three times post-cryopreservation. **c** THY\_4332\_CL3 appeared to have reduced somy levels between first and second sequencing (four passages), but no sub-clonal variation was observed ( $n = 3$ ).

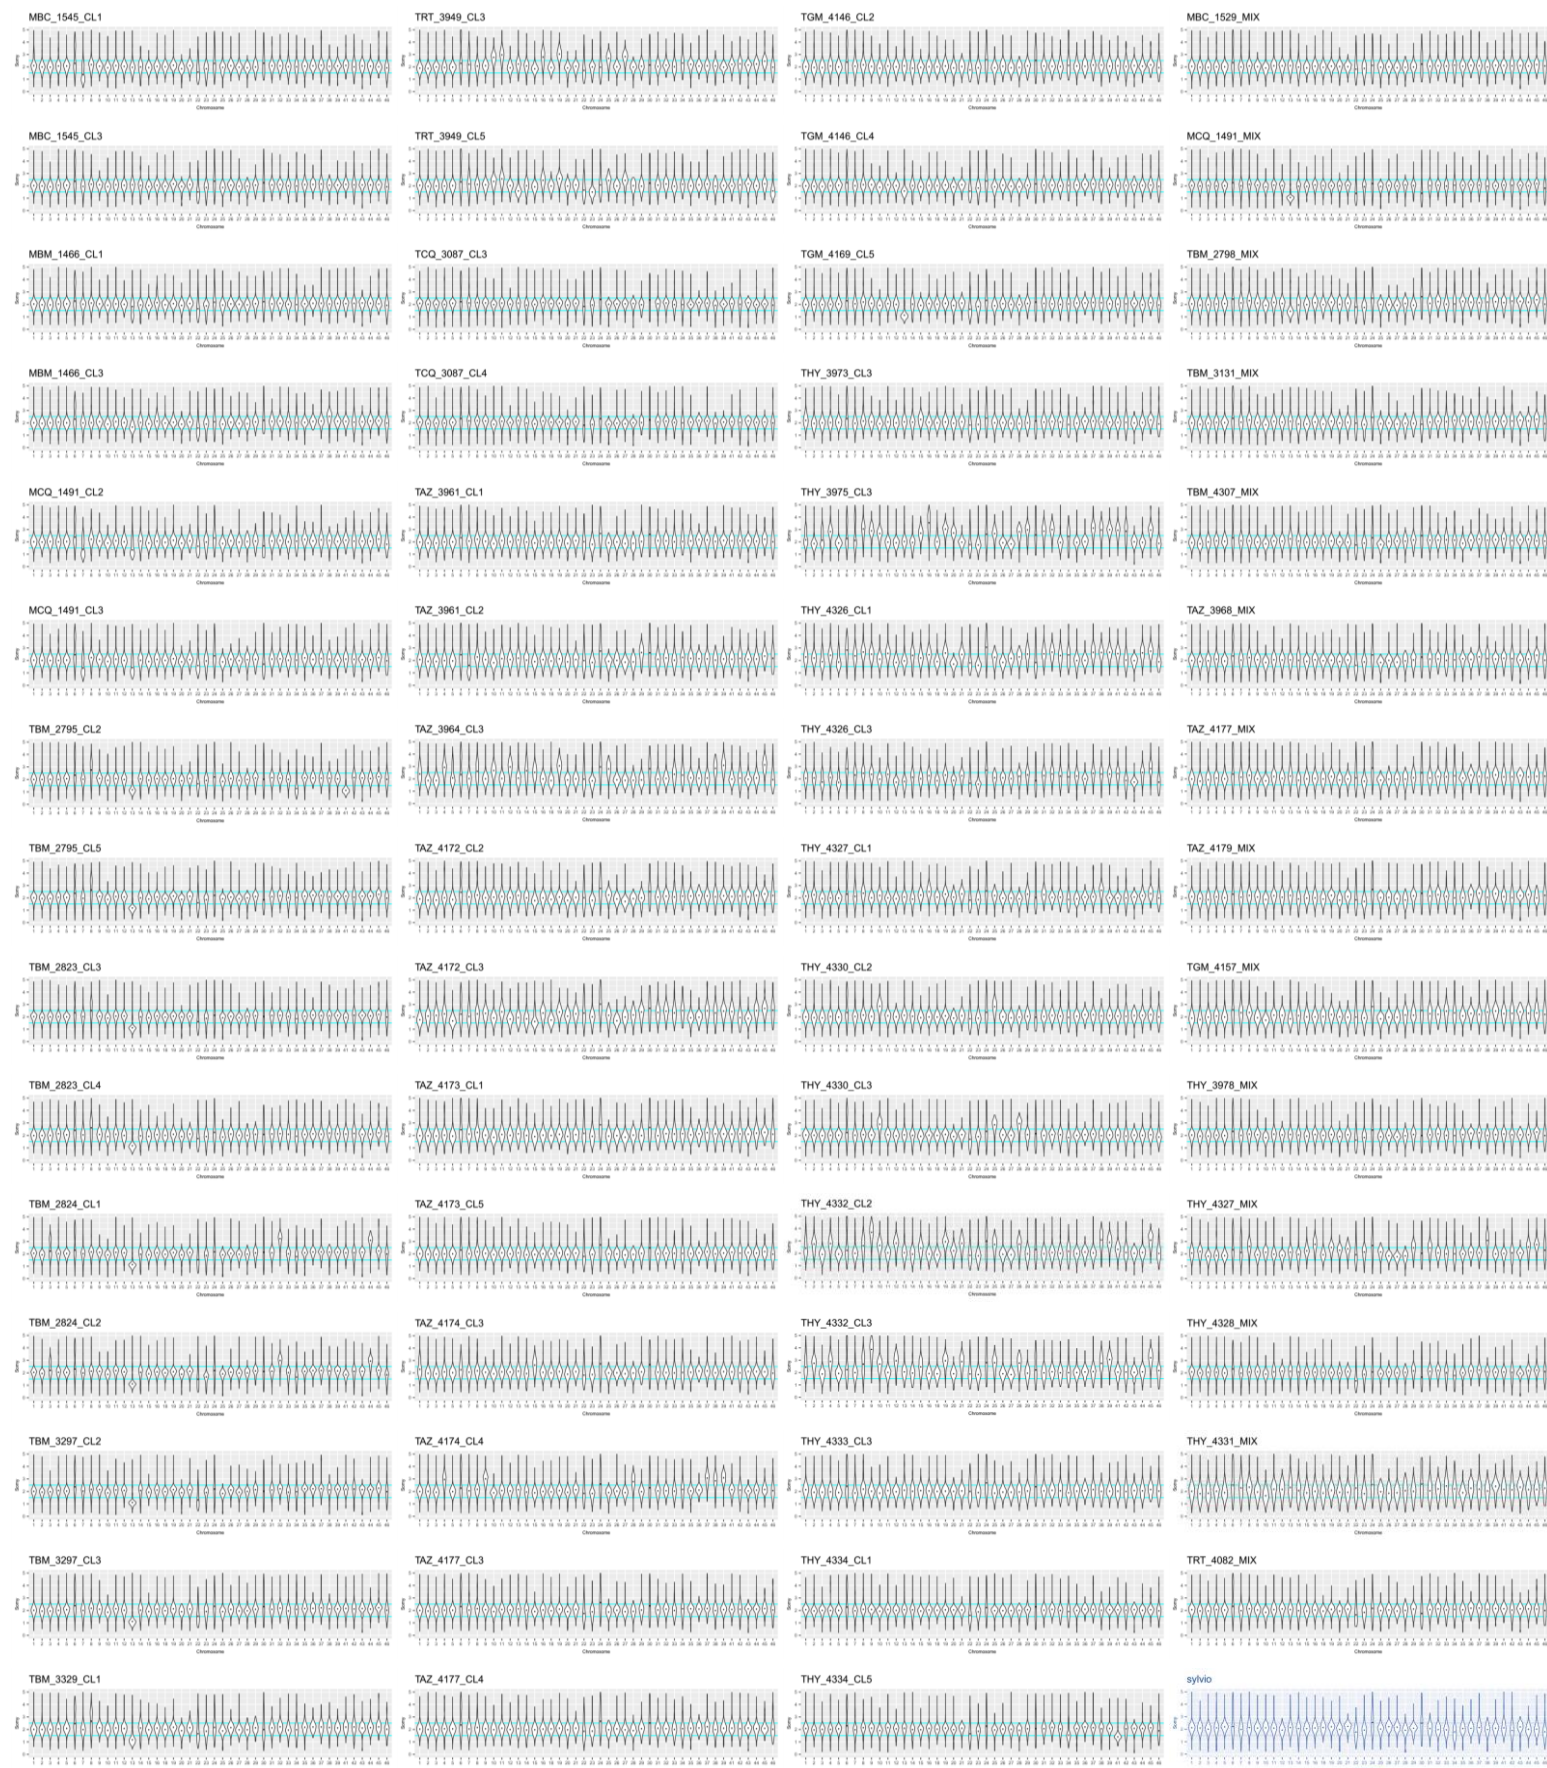

Supplementary Figure 14. Some estimates for cloned and non-cloned *T. cruzi* samples. Some variation among samples was inferred from sequence read-depth kernel density distributions. Dots within violin plots indicate the median of site-wise some estimates ( $2 \cdot m / p_{30}$  of  $M_m$ ) for each chromosome (see *Methods*). Results for the TcI-Sylvio reference validate the procedure. Results for non-cloned, low-diversity infections (e.g., MCQ\_1491\_MIX and THY\_4327\_MIX) suggest that aneuploidies in clones are not consequences of plate-cloning procedures in the lab.

a

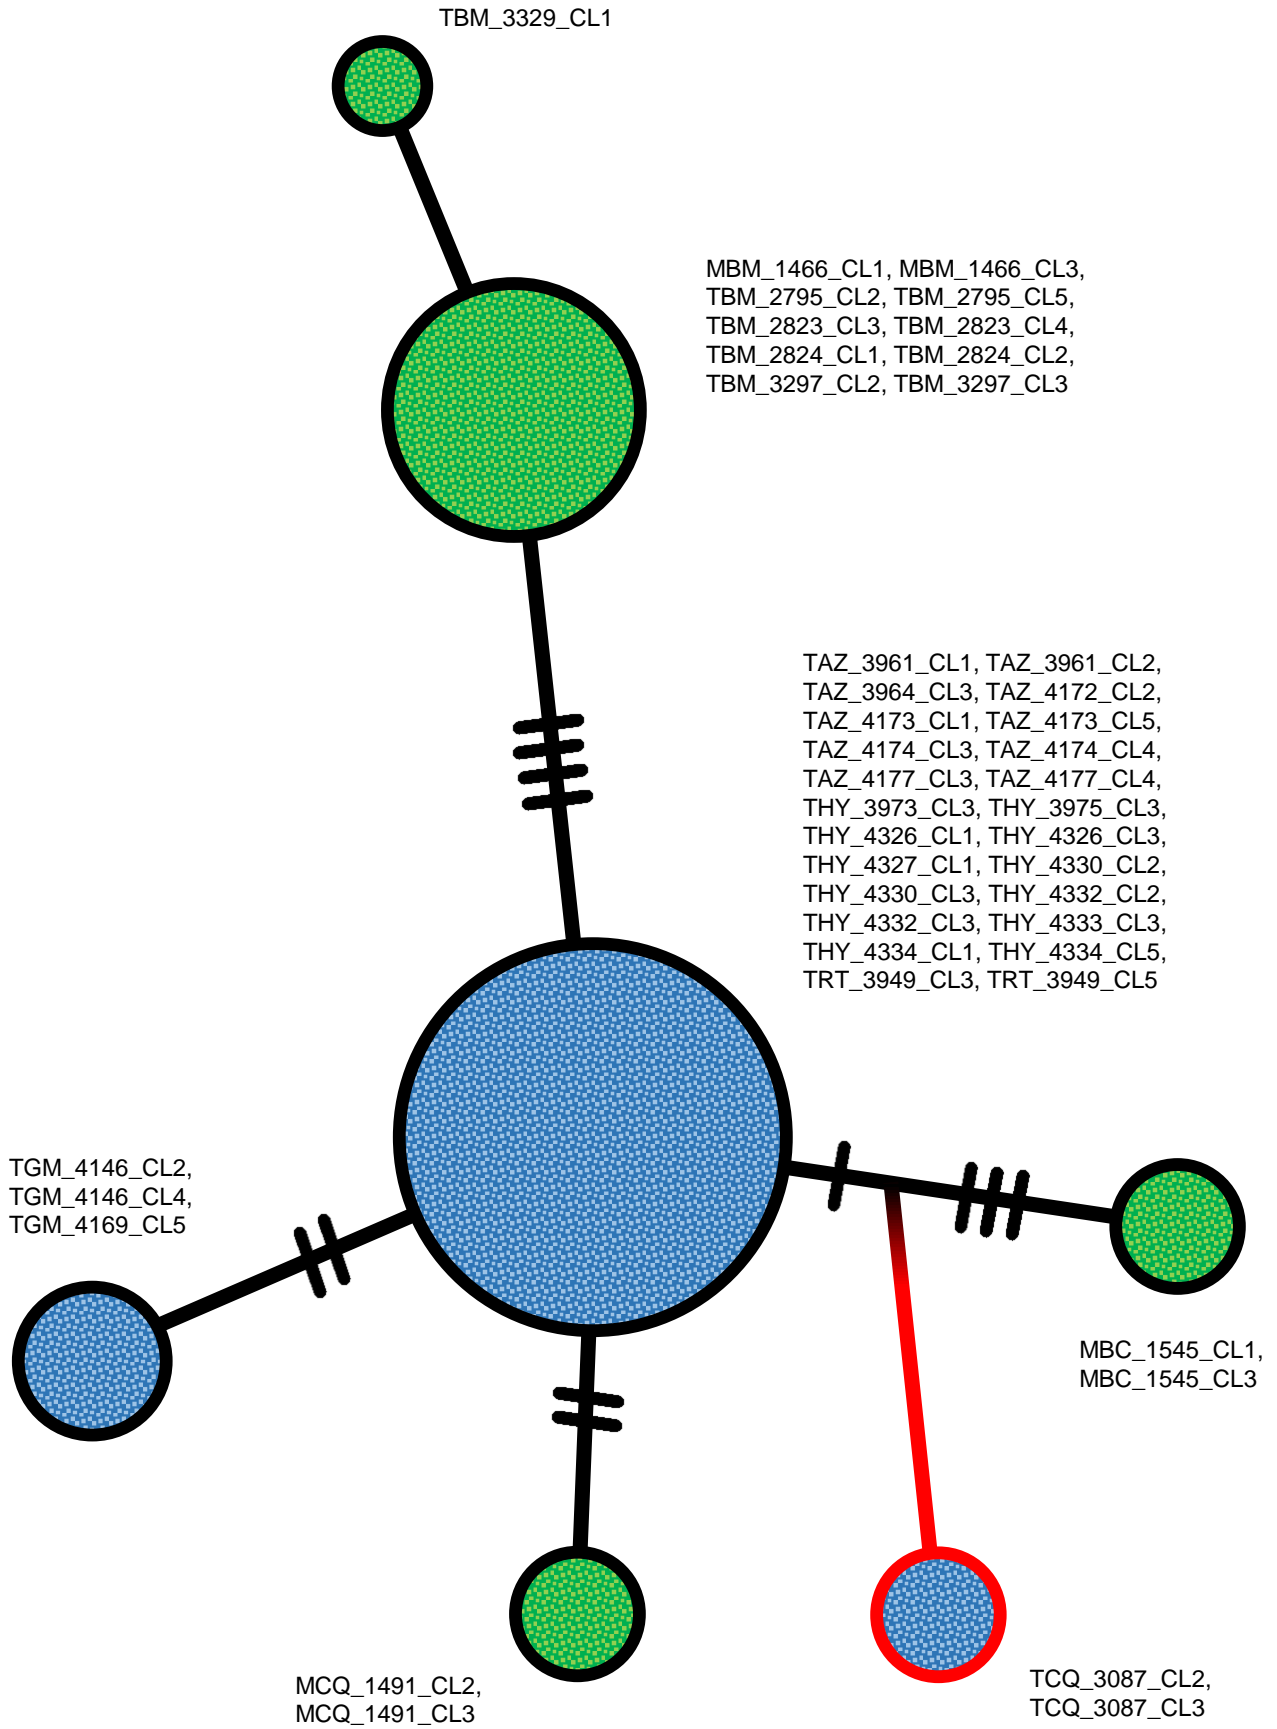



**b**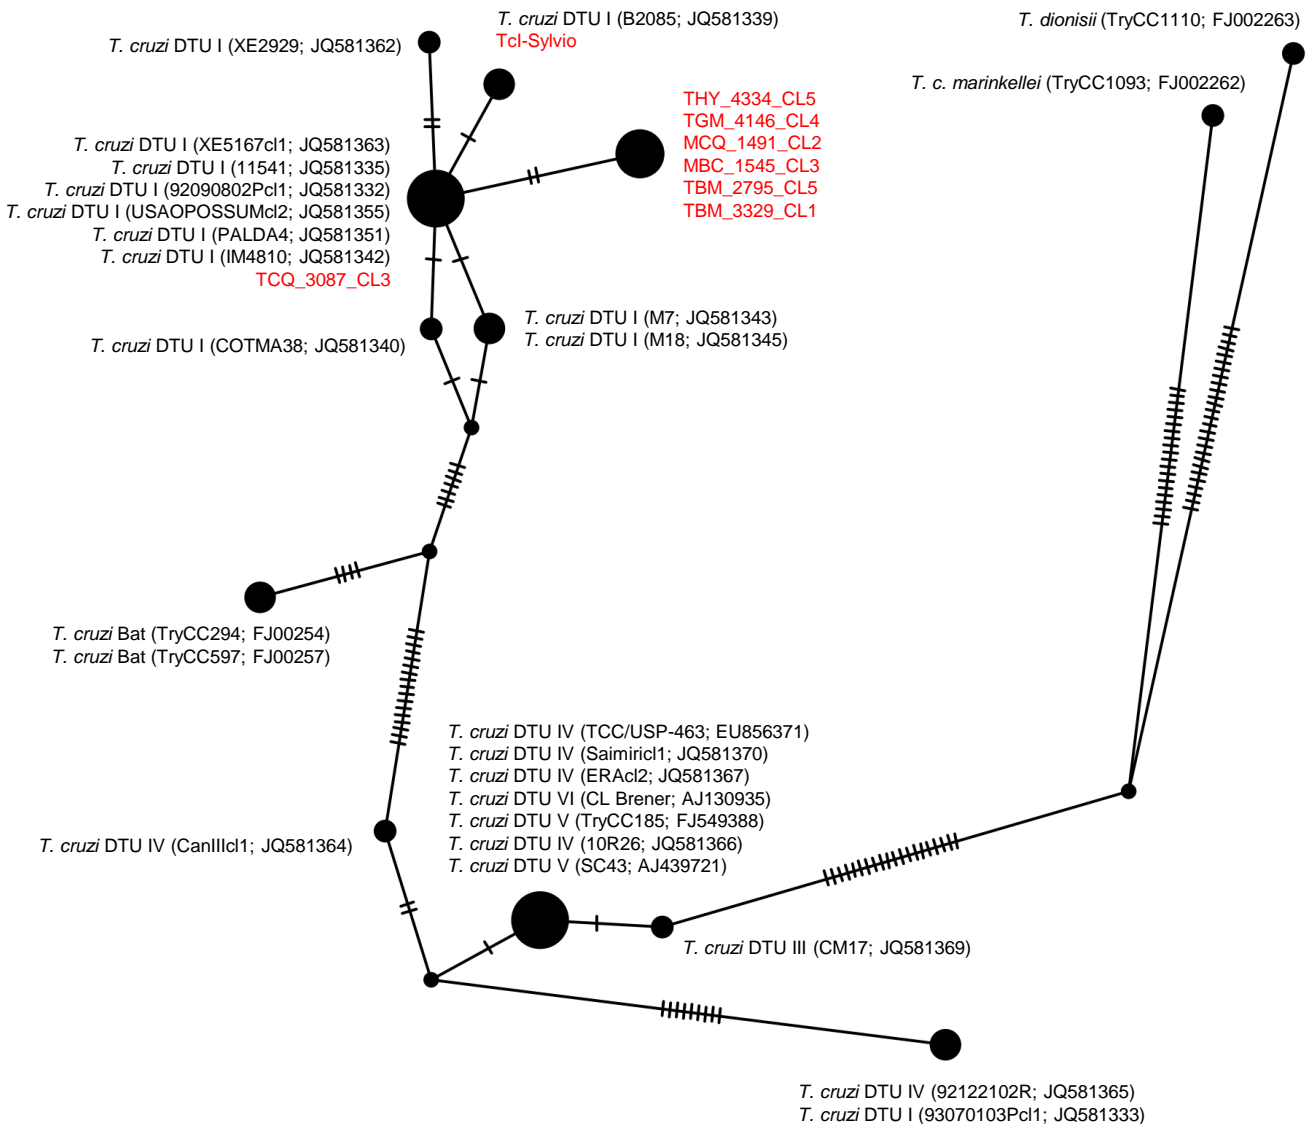

Supplementary Figure 15. Mitochondrial phylogenies for *T. cruzi* I clones. **a** Maxicircle sequence variation among all samples except TAZ\_4172\_CL3 (missing information at 44% SNP sites) represented as a TCS network<sup>6</sup>. Black tick marks between nodes indicate the number of mutations between genotypes. Node sizes correspond to the number of samples represented by the particular maxicircle variant. Green nodes contain members of Cluster 1, as defined in nuclear phylogenetic analysis (Fig. 1). Blue nodes contain members of Cluster 2, but also TRT\_3949 clones. TCQ\_3087 clones appear divergent, with 668 diagnostic SNP differences relative to other clones of Cluster 2. **b** TCS network from *cytochrome b* alignment (617 bp), for which sequences from all 7 *T. cruzi* sublineages and various congeners are available for comparison. These sequences are detailed in Messenger *et al.* 2012<sup>7</sup> and Marcili *et al.* 2009<sup>8</sup>. Tick marks indicate number of mutations between genotypes. Samples from this study (one representative per maxicircle variant) are shown in red.

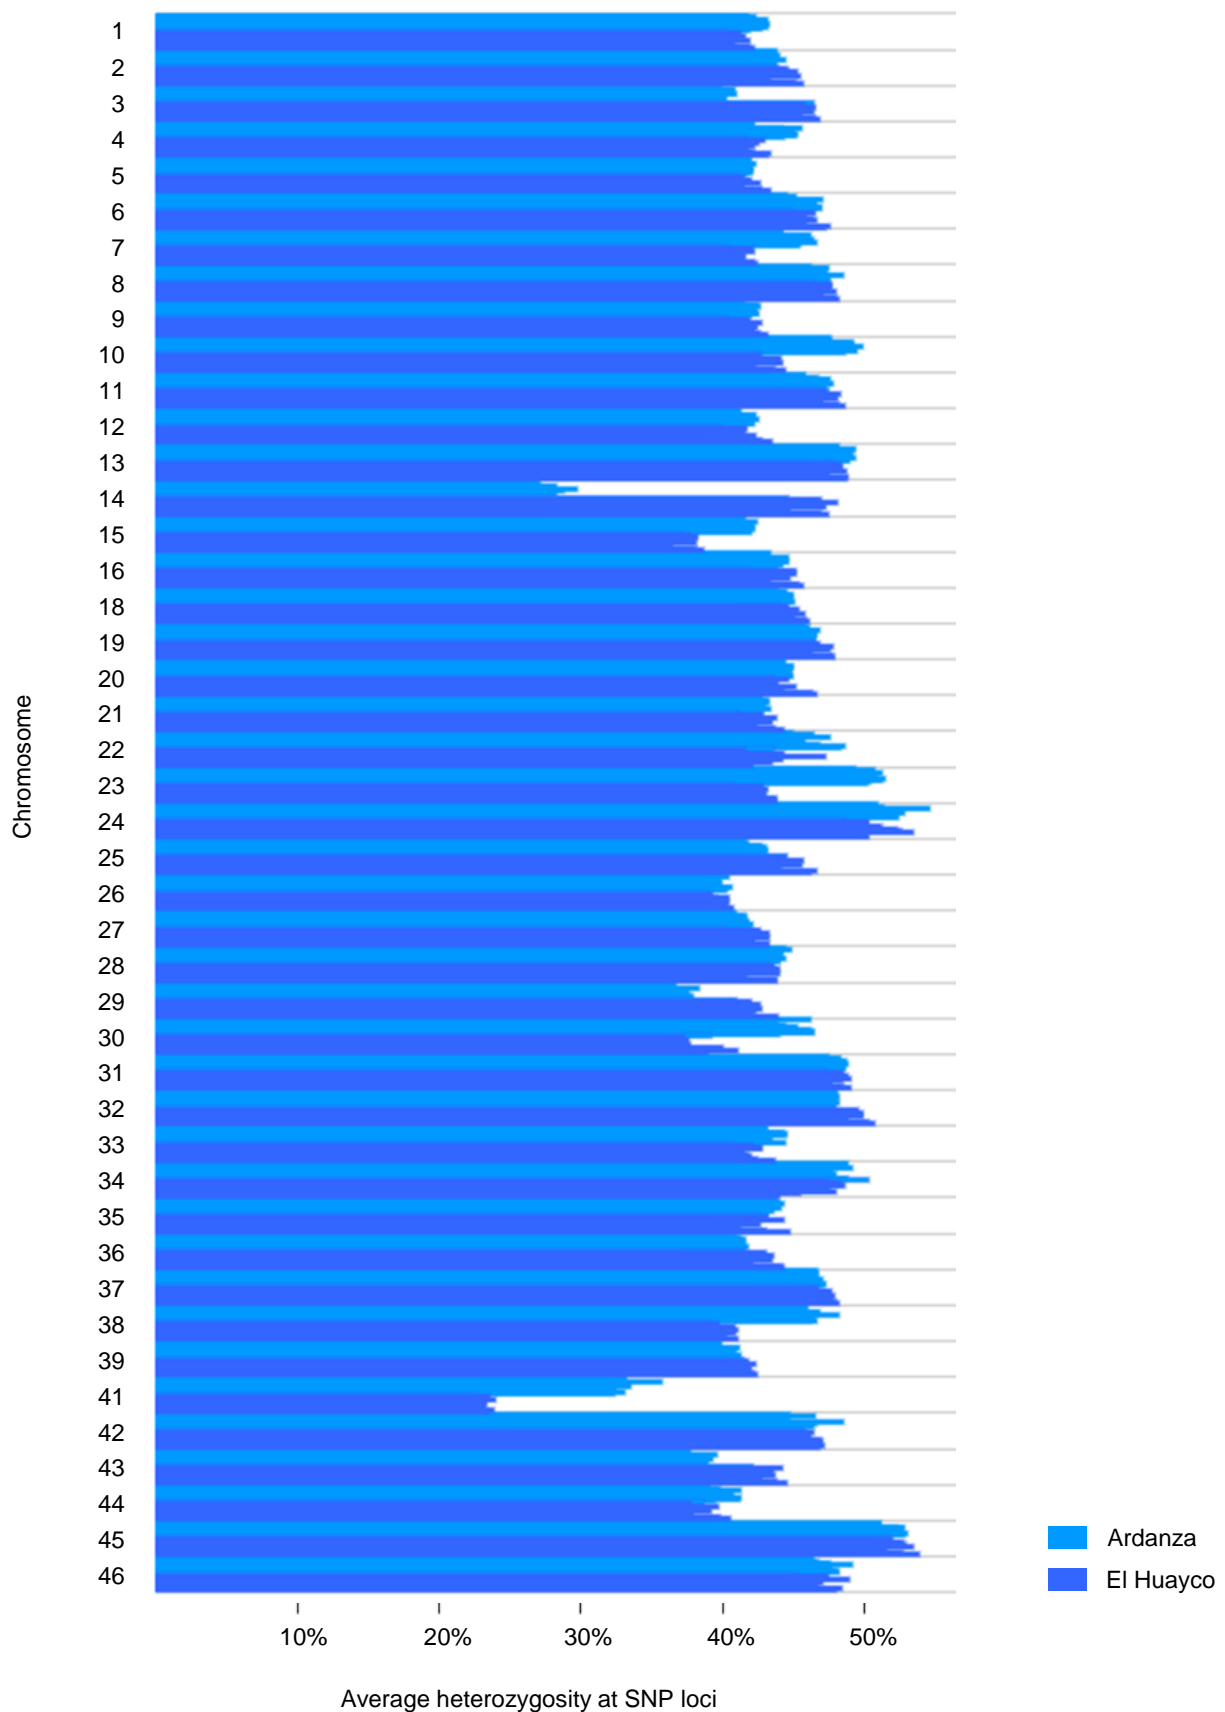

Supplementary Figure 16. Heterozygosity per chromosome in *T. cruzi* I clones from El Huayco and Ardanza. Average heterozygosity values fall between 40 and 50% for most chromosomes. Only chromosomes 14 (in Ardanza clones) and 41 (in both Ardanza and El Huayco clones) show substantial increases in homozygosity.

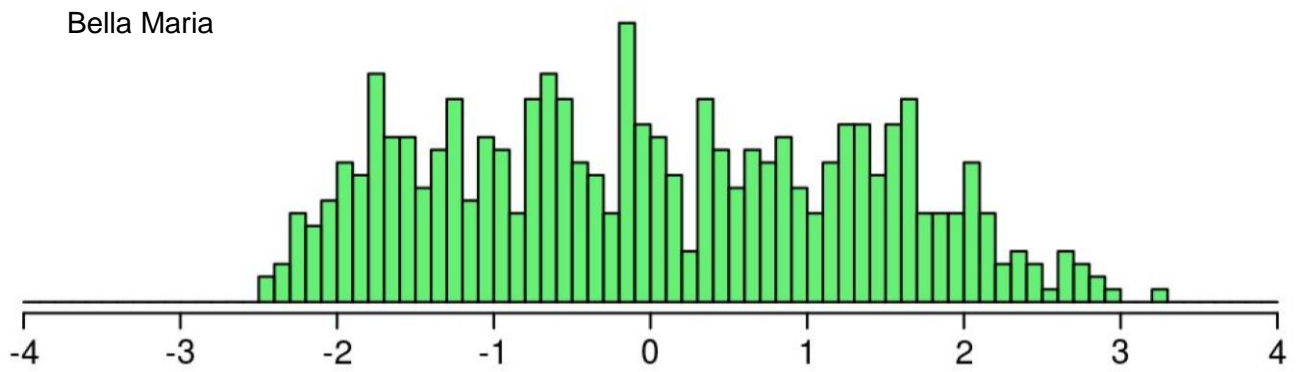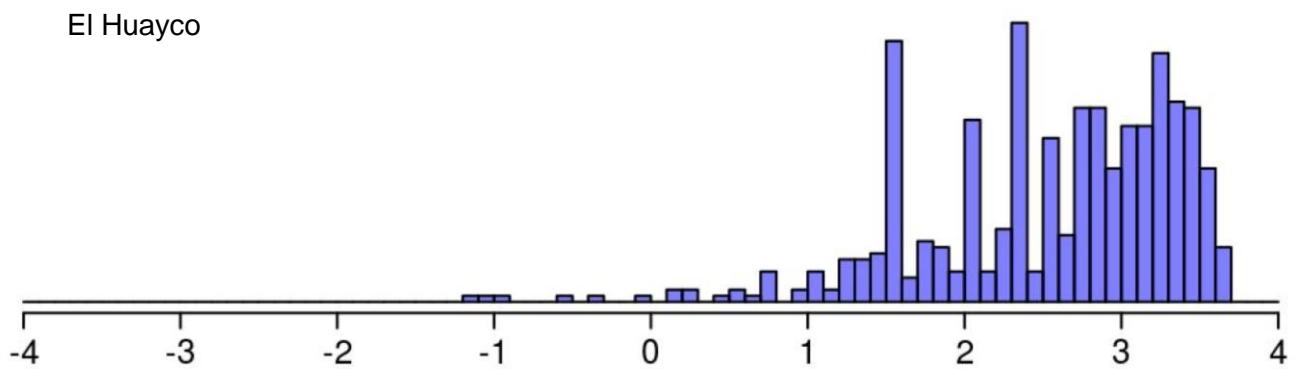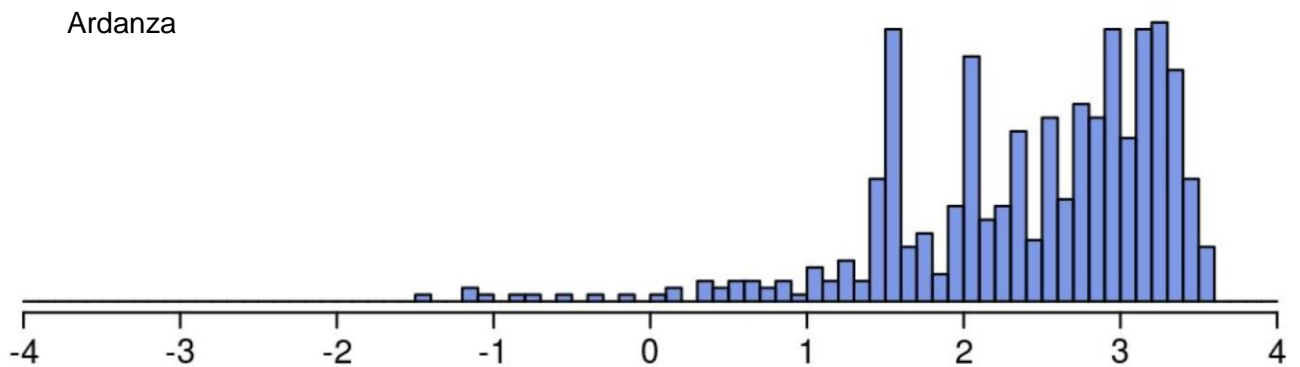

Genome-wide Tajima's D

Supplementary Figure 17. SNP variation relative to neutral expectations in *T. cruzi* I groups. Histograms plot variation in Tajima's D values over 50 kb sequence bins in genomes from Bella Maria (96,691 SNPs), El Huayco (80,052 SNPs) and Ardanza (78,325 SNPs). Empty bins (i.e., windows lacking polymorphism within the group) do not enter analysis.

Supplementary Table 1 Host/vector sampling sites and *T. cruzi* I genomic sequencing coverage

| ID           | Longitude (°) | Latitude (°) | Altitude (m) | Region      | Ecotype       | Host                                  | Year | NRD  | MRD   |
|--------------|---------------|--------------|--------------|-------------|---------------|---------------------------------------|------|------|-------|
| MBC_1545_CL1 | -79.6039      | -4.2134      | 1143         | Bella Maria | sylvatic      | <i>Artibeus fraterculus</i>           | 2012 | 23.3 | 75.4  |
| MBC_1545_CL3 | -79.6039      | -4.2134      | 1143         | Bella Maria | sylvatic      | <i>Artibeus fraterculus</i>           | 2012 | 24.8 | 114.0 |
| MBM_1466_CL1 | -79.6166      | -4.2185      | 1376         | Bella Maria | sylvatic      | <i>Rhipidomys leucodactylus</i>       | 2012 | 22.4 | 92.2  |
| MBM_1466_CL3 | -79.6166      | -4.2185      | 1376         | Bella Maria | sylvatic      | <i>Rhipidomys leucodactylus</i>       | 2012 | 20.5 | 110.0 |
| MCQ_1491_CL2 | -79.5995      | -4.2241      | 1272         | Bella Maria | sylvatic      | <i>Simosciurus neboxii</i>            | 2012 | 16.4 | 167.4 |
| MCQ_1491_CL3 | -79.5995      | -4.2241      | 1272         | Bella Maria | sylvatic      | <i>Simosciurus neboxii</i>            | 2012 | 18.8 | 112.6 |
| TAZ_3961_CL1 | -79.5969      | -4.2878      | 1311         | Ardanza     | domestic      | <i>Panstrongylus rufotuberculatus</i> | 2015 | 15.1 | 34.3  |
| TAZ_3961_CL2 | -79.5969      | -4.2878      | 1311         | Ardanza     | domestic      | <i>Panstrongylus rufotuberculatus</i> | 2015 | 15.1 | 47.1  |
| TAZ_3964_CL3 | -79.5969      | -4.2878      | 1311         | Ardanza     | domestic      | <i>Panstrongylus rufotuberculatus</i> | 2015 | 13.6 | 50.5  |
| TAZ_4172_CL2 | -79.5969      | -4.2878      | 1311         | Ardanza     | domestic      | <i>Panstrongylus rufotuberculatus</i> | 2015 | 29.8 | 26.8  |
| TAZ_4172_CL3 | -79.5969      | -4.2878      | 1311         | Ardanza     | domestic      | <i>Panstrongylus rufotuberculatus</i> | 2015 | 24.7 | 6.0   |
| TAZ_4173_CL1 | -79.5969      | -4.2878      | 1311         | Ardanza     | domestic      | <i>Panstrongylus rufotuberculatus</i> | 2015 | 14.0 | 23.5  |
| TAZ_4173_CL5 | -79.5969      | -4.2878      | 1311         | Ardanza     | domestic      | <i>Panstrongylus rufotuberculatus</i> | 2015 | 23.0 | 57.7  |
| TAZ_4174_CL3 | -79.5969      | -4.2878      | 1311         | Ardanza     | domestic      | <i>Panstrongylus rufotuberculatus</i> | 2015 | 16.0 | 59.5  |
| TAZ_4174_CL4 | -79.5969      | -4.2878      | 1311         | Ardanza     | domestic      | <i>Panstrongylus rufotuberculatus</i> | 2015 | 22.8 | 116.3 |
| TAZ_4177_CL3 | -79.5969      | -4.2878      | 1311         | Ardanza     | domestic      | <i>Panstrongylus rufotuberculatus</i> | 2015 | 21.4 | 47.0  |
| TAZ_4177_CL4 | -79.5969      | -4.2878      | 1311         | Ardanza     | domestic      | <i>Panstrongylus rufotuberculatus</i> | 2015 | 16.1 | 65.9  |
| TBM_2795_CL2 | -79.6063      | -4.2115      | 1132         | Bella Maria | domestic      | <i>Panstrongylus chinai</i>           | 2011 | 25.9 | 149.2 |
| TBM_2795_CL5 | -79.6063      | -4.2115      | 1132         | Bella Maria | domestic      | <i>Panstrongylus chinai</i>           | 2011 | 55.1 | 406.7 |
| TBM_2823_CL3 | -79.6063      | -4.2115      | 1132         | Bella Maria | domestic      | <i>Panstrongylus chinai</i>           | 2011 | 53.5 | 185.3 |
| TBM_2823_CL4 | -79.6063      | -4.2115      | 1132         | Bella Maria | domestic      | <i>Panstrongylus chinai</i>           | 2011 | 17.3 | 71.6  |
| TBM_2824_CL1 | -79.6063      | -4.2115      | 1132         | Bella Maria | domestic      | <i>Panstrongylus chinai</i>           | 2011 | 50.9 | 296.7 |
| TBM_2824_CL2 | -79.6063      | -4.2115      | 1132         | Bella Maria | domestic      | <i>Panstrongylus chinai</i>           | 2011 | 53.8 | 180.0 |
| TBM_3297_CL2 | -79.5985      | -4.2285      | 1265         | Bella Maria | sylvatic      | <i>Rhodnius ecuadoriensis</i>         | 2013 | 64.0 | 474.7 |
| TBM_3297_CL3 | -79.5985      | -4.2285      | 1265         | Bella Maria | sylvatic      | <i>Rhodnius ecuadoriensis</i>         | 2013 | 21.7 | 154.2 |
| TBM_3329_CL1 | -79.6170      | -4.2085      | 1379         | Bella Maria | sylvatic      | <i>Rhodnius ecuadoriensis</i>         | 2013 | 18.5 | 61.3  |
| TCQ_3087_CL3 | -79.5972      | -4.2258      | 1203         | Bella Maria | sylvatic      | <i>Rhodnius ecuadoriensis</i>         | 2012 | 54.6 | 580.8 |
| TCQ_3087_CL4 | -79.5972      | -4.2258      | 1203         | Bella Maria | sylvatic      | <i>Rhodnius ecuadoriensis</i>         | 2012 | 45.7 | 301.4 |
| TGM_4146_CL2 | -79.4635      | -4.0952      | 1801         | Gerinoma    | peri-domestic | <i>Triatoma carrioni</i>              | 2015 | 12.7 | 53.3  |
| TGM_4146_CL4 | -79.4635      | -4.0952      | 1801         | Gerinoma    | peri-domestic | <i>Triatoma carrioni</i>              | 2015 | 19.5 | 86.5  |
| TGM_4169_CL5 | -79.4635      | -4.0952      | 1801         | Gerinoma    | peri-domestic | <i>Triatoma carrioni</i>              | 2015 | 19.5 | 67.4  |
| THY_3973_CL3 | -79.3188      | -4.0906      | 1375         | El Huayco   | sylvatic      | <i>Rhodnius ecuadoriensis</i>         | 2015 | 13.6 | 55.1  |
| THY_3975_CL3 | -79.3188      | -4.0906      | 1375         | El Huayco   | sylvatic      | <i>Rhodnius ecuadoriensis</i>         | 2015 | 25.2 | 129.9 |
| THY_4326_CL1 | -79.3188      | -4.0906      | 1375         | El Huayco   | sylvatic      | <i>Rhodnius ecuadoriensis</i>         | 2015 | 16.9 | 34.3  |
| THY_4326_CL3 | -79.3188      | -4.0906      | 1375         | El Huayco   | sylvatic      | <i>Rhodnius ecuadoriensis</i>         | 2015 | 36.9 | 82.3  |
| THY_4327_CL1 | -79.3188      | -4.0906      | 1375         | El Huayco   | sylvatic      | <i>Rhodnius ecuadoriensis</i>         | 2015 | 16.7 | 82.3  |
| THY_4330_CL2 | -79.3188      | -4.0906      | 1375         | El Huayco   | sylvatic      | <i>Rhodnius ecuadoriensis</i>         | 2015 | 16.3 | 70.7  |
| THY_4330_CL3 | -79.3188      | -4.0906      | 1375         | El Huayco   | sylvatic      | <i>Rhodnius ecuadoriensis</i>         | 2015 | 25.8 | 125.5 |
| THY_4332_CL2 | -79.3188      | -4.0906      | 1375         | El Huayco   | sylvatic      | <i>Rhodnius ecuadoriensis</i>         | 2015 | 20.8 | 28.0  |
| THY_4332_CL3 | -79.3188      | -4.0906      | 1375         | El Huayco   | sylvatic      | <i>Rhodnius ecuadoriensis</i>         | 2015 | 22.8 | 12.4  |
| THY_4333_CL3 | -79.3188      | -4.0906      | 1375         | El Huayco   | sylvatic      | <i>Rhodnius ecuadoriensis</i>         | 2015 | 15.1 | 68.1  |
| THY_4334_CL1 | -79.3188      | -4.0906      | 1375         | El Huayco   | sylvatic      | <i>Rhodnius ecuadoriensis</i>         | 2015 | 27.2 | 118.7 |
| THY_4334_CL5 | -79.3188      | -4.0906      | 1375         | El Huayco   | sylvatic      | <i>Rhodnius ecuadoriensis</i>         | 2015 | 36.2 | 255.8 |
| TRT_3949_CL3 | -79.3475      | -4.1125      | 1278         | Santa Rita  | domestic      | <i>Panstrongylus chinai</i>           | 2015 | 20.2 | 88.1  |
| TRT_3949_CL5 | -79.3475      | -4.1125      | 1278         | Santa Rita  | domestic      | <i>Panstrongylus chinai</i>           | 2015 | 18.9 | 68.8  |

Abbreviations: NRD (average nuclear read-depth); MRD (average maxicircle read-depth).

Supplementary Table 2 Examples of long tracts of homozygosity found in *T. cruzi* I genomes

| ID           | Chromosome | Start pos. (bp) | End pos. (bp) | No. of variants | No. of mismatches | Region      | Cluster |
|--------------|------------|-----------------|---------------|-----------------|-------------------|-------------|---------|
| MBC_1545_CL1 | 1          | 2527616         | 2735662       | 377             | 1                 | Bella Maria | 1       |
| MBC_1545_CL1 | 3          | 688123          | 992700        | 193             | 0                 | Bella Maria | 1       |
| MBC_1545_CL1 | 3          | 688123          | 992700        | 204             | 0                 | Bella Maria | 1       |
| MBC_1545_CL1 | 4          | 1078068         | 1217217       | 98              | 3                 | Bella Maria | 1       |
| MBC_1545_CL1 | 5          | 244489          | 367798        | 226             | 0                 | Bella Maria | 1       |
| MBC_1545_CL1 | 5          | 642558          | 754816        | 540             | 1                 | Bella Maria | 1       |
| MBC_1545_CL1 | 7          | 330951          | 911251        | 282             | 2                 | Bella Maria | 1       |
| MBC_1545_CL1 | 7          | 934166          | 1174673       | 793             | 0                 | Bella Maria | 1       |
| MBC_1545_CL1 | 10         | 74632           | 241049        | 910             | 1                 | Bella Maria | 1       |
| MBC_1545_CL1 | 10         | 553233          | 691425        | 89              | 1                 | Bella Maria | 1       |
| MBC_1545_CL1 | 10         | 752929          | 1034308       | 766             | 3                 | Bella Maria | 1       |
| MBC_1545_CL1 | 15         | 106823          | 318213        | 1304            | 3                 | Bella Maria | 1       |
| MBC_1545_CL1 | 15         | 510886          | 782403        | 925             | 1                 | Bella Maria | 1       |
| MBC_1545_CL1 | 15         | 784193          | 934142        | 659             | 0                 | Bella Maria | 1       |
| MBC_1545_CL1 | 16         | 206821          | 502967        | 544             | 1                 | Bella Maria | 1       |
| MBC_1545_CL1 | 19         | 235735          | 342459        | 289             | 5                 | Bella Maria | 1       |
| MBC_1545_CL1 | 19         | 625331          | 769267        | 826             | 1                 | Bella Maria | 1       |
| MBC_1545_CL1 | 31         | 323674          | 456229        | 766             | 7                 | Bella Maria | 1       |
| MBC_1545_CL1 | 35         | 213894          | 501036        | 803             | 0                 | Bella Maria | 1       |
| MBC_1545_CL1 | 36         | 99405           | 228968        | 448             | 0                 | Bella Maria | 1       |
| MBC_1545_CL1 | 36         | 99405           | 228968        | 894             | 0                 | Bella Maria | 1       |
| MBC_1545_CL1 | 41         | 135171          | 239973        | 513             | 0                 | Bella Maria | 1       |
| MBC_1545_CL1 | 41         | 135171          | 239973        | 1023            | 0                 | Bella Maria | 1       |
| MBC_1545_CL1 | 42         | 394695          | 618542        | 513             | 5                 | Bella Maria | 1       |
| MCQ_1491_CL2 | 1          | 590428          | 761231        | 10              | 0                 | Bella Maria | 1       |
| MCQ_1491_CL2 | 1          | 1494729         | 1618252       | 64              | 3                 | Bella Maria | 1       |
| MCQ_1491_CL2 | 1          | 1494729         | 1618252       | 68              | 0                 | Bella Maria | 1       |
| MCQ_1491_CL2 | 1          | 1494729         | 1618252       | 69              | 0                 | Bella Maria | 1       |
| MCQ_1491_CL2 | 1          | 2527893         | 2702894       | 123             | 4                 | Bella Maria | 1       |
| MCQ_1491_CL2 | 3          | 1190725         | 1409940       | 625             | 5                 | Bella Maria | 1       |
| MCQ_1491_CL2 | 4          | 1097976         | 1222344       | 27              | 0                 | Bella Maria | 1       |
| MCQ_1491_CL2 | 7          | 934166          | 1196685       | 262             | 0                 | Bella Maria | 1       |
| MCQ_1491_CL2 | 10         | 351472          | 525227        | 182             | 0                 | Bella Maria | 1       |
| MCQ_1491_CL2 | 10         | 750071          | 1059591       | 799             | 2                 | Bella Maria | 1       |
| MCQ_1491_CL2 | 12         | 615126          | 831143        | 32              | 0                 | Bella Maria | 1       |
| MCQ_1491_CL2 | 12         | 615126          | 831143        | 62              | 0                 | Bella Maria | 1       |
| MCQ_1491_CL2 | 13         | 380831          | 571325        | 672             | 2                 | Bella Maria | 1       |
| MCQ_1491_CL2 | 13         | 380831          | 571325        | 694             | 0                 | Bella Maria | 1       |
| MCQ_1491_CL2 | 13         | 590920          | 891408        | 285             | 1                 | Bella Maria | 1       |
| MCQ_1491_CL2 | 13         | 590920          | 891408        | 290             | 0                 | Bella Maria | 1       |
| MCQ_1491_CL2 | 14         | 768946          | 873091        | 352             | 0                 | Bella Maria | 1       |
| MCQ_1491_CL2 | 16         | 923925          | 1076491       | 615             | 0                 | Bella Maria | 1       |
| MCQ_1491_CL2 | 25         | 693             | 273362        | 1039            | 4                 | Bella Maria | 1       |
| MCQ_1491_CL2 | 27         | 46321           | 205232        | 627             | 2                 | Bella Maria | 1       |
| MCQ_1491_CL2 | 28         | 405150          | 507611        | 139             | 2                 | Bella Maria | 1       |
| TAZ_3961_CL2 | 7          | 925153          | 1113043       | 177             | 3                 | Ardanza     | 2       |
| THY_4330_CL3 | 35         | 21625           | 153853        | 22              | 0                 | El Huayco   | 2       |

This table summarizes long tracts of homozygosity found in MBC\_1545\_CL1 and MCQ\_1491\_CL2, two clones that typify homozygosity patterns in the Bella Maria group. Clones from El Huayco and Ardanza except THY\_4330\_CL3 and TAZ\_3961\_CL2 (one single occurrence each) entirely lack these tracts.

Supplementary Table 3 Recalculation of population genetic descriptive metrics using only one random *T. cruzi* I clone per vector/host

| Group ( <i>n</i> ) | PS     | Median $\pi$ | Median $\theta$ | PS at MAF > 0.05 | PRS (vs. BM / EH / AR) | SS     | PS in HW Equilibrium | HS     | Fixed HS |
|--------------------|--------|--------------|-----------------|------------------|------------------------|--------|----------------------|--------|----------|
| Bella Maria (8)    | 95,313 | 0.13         | 0.001           | 59 %             | 0 / 41,270 / 41,063    | 22,344 | 90,461               | 55,571 | 2,848    |
| El Huayco (8)      | 76,889 | 0.53         | 0.001           | 71 %             | 22,846 / 0 / 17,681    | 6,855  | 44,911               | 56,016 | 45,792   |
| Ardanza (6)        | 75,709 | 0.55         | 0.001           | 71 %             | 21,459 / 16,501 / 0    | 9,844  | 72,968               | 55,638 | 47,761   |

We reduced the dataset to identify biases related to multiple- vs. single-clone sampling per infection. While overall inference is similar, single-clone sampling can raise estimates of nucleotide diversity and rates of type II error in Hardy-Weinberg equilibrium null hypothesis testing (see power analysis in Supplementary Fig. 4). Abbreviations: PS (polymorphic sites);  $\pi$  (nucleotide diversity, per site);  $\theta$  (Watterson estimator, per site); MAF (within-group minor allele frequency); PRS (private sites); SS (singleton sites); HW (Hardy-Weinberg); HS (heterozygous sites).

Supplementary Table 4 Re-sequencing of clones and subclones for additional ploidy analyses

| ID                 | Type     | No. of passages in LIT | RL      | NRD |
|--------------------|----------|------------------------|---------|-----|
| TAZ_4174_CL4_T2    | Clone    | 0                      | 2 x 75  | 135 |
| THY_4326_CL1_T2    | Clone    | 3                      | 2 x 75  | 131 |
| THY_4332_CL3_T2    | Clone    | 4                      | 2 x 75  | 180 |
| TAZ_4174_CL4_T2_D1 | Subclone | 0                      | 2 x 150 | 31  |
| THY_4326_CL1_T2_D1 | Subclone | 0                      | 2 x 150 | 49  |
| THY_4326_CL1_T2_D2 | Subclone | 0                      | 2 x 150 | 26  |
| THY_4332_CL3_T2_D1 | Subclone | 0                      | 2 x 150 | 44  |
| THY_4332_CL3_T2_D2 | Subclone | 0                      | 2 x 150 | 59  |
| THY_4332_CL3_T2_D3 | Subclone | 0                      | 2 x 150 | 41  |

Having entered cryopreservation (-150 °C) immediately after the first epimastigote DNA extraction (Dec. 2016), three clones were re-expanded into liquid culture and further subcloned by limiting dilution starting Dec. 2018. These clones and subclones underwent ≤ 4 passages in Liver Infusion Tryptose (LIT) medium prior to epimastigote DNA extraction in Mar. 2019. Abbreviations: RL (read-length); NRD (average nuclear read-depth).

## Supplementary References

1. Ward, J. H. Hierarchical grouping to optimize an objective function. *J. Am. Stat. Assoc.* **58**, 236 (1963).
2. Danecek, P. *et al.* The variant call format and VCFtools. *Bioinformatics* **27**, 2156–2158 (2011).
3. Ewing, A. D. *et al.* Combining tumor genome simulation with crowdsourcing to benchmark somatic single-nucleotide-variant detection. *Nat. Methods* **12**, 623–630 (2015).
4. Derrien, T. *et al.* Fast computation and applications of genome mappability. *PLoS One* **7**, (2012).
5. Martin, S. H. & Van Belleghem, S. M. Exploring evolutionary relationships across the genome using topology weighting. *Genetics* **206**, 429–438 (2017).
6. Clement, M., Posada, D. & Crandall, K. A. TCS: a computer program to estimate gene genealogies. *Mol. Ecol.* **9**, 1657–1659 (2000).
7. Messenger, L. A. *et al.* Multiple mitochondrial introgression events and heteroplasmy in *Trypanosoma cruzi* revealed by maxicircle MLST and next generation sequencing. *PLoS Negl. Trop. Dis.* **6**, e1584 (2012).
8. Marcili, A. *et al.* A new genotype of *Trypanosoma cruzi* associated with bats evidenced by phylogenetic analyses using *SSU* rDNA, *cytochrome b* and *Histone H2B* genes and genotyping based on *ITS1* rDNA. *Parasitology* **136**, 641–655 (2009).
